## **Attentional Modulations of Alpha Power Are Sensitive to the Task-relevance of Auditory Spatial Information**

Laura-Isabelle Klatt<sup>\*a</sup>, Stephan Getzmann<sup>a</sup>, Daniel Schneider<sup>a</sup>

<sup>a</sup> *Leibniz Research Centre for Working Environment and Human Factors*  
Ardeystr. 67  
44139 Dortmund  
Germany

\* corresponding author: [klatt@ifado.de](mailto:klatt@ifado.de)

Contact details of all other authors:

Stephan Getzmann: [getzmann@ifado.de](mailto:getzmann@ifado.de)

Daniel Schneider: [schneiderd@ifado.de](mailto:schneiderd@ifado.de)

1 **Abstract**

2 The topographical distribution of oscillatory power in the alpha band is known to vary  
3 depending on the current focus of spatial attention. Here, we investigated to what extent  
4 univariate and multivariate measures of post-stimulus alpha power are sensitive to the  
5 required spatial specificity of a task. To this end, we varied the perceptual load and the  
6 spatial demand in an auditory search paradigm. A centrally presented sound at the  
7 beginning of each trial indicated the to-be-localized target sound. This spatially unspecific  
8 pre-cue was followed by a sound array, containing either two (low perceptual load) or four  
9 (high perceptual load) simultaneously presented lateralized sound stimuli. In separate task  
10 blocks, participants were instructed either to report whether the target was located on the  
11 left or the right side of the sound array (low spatial demand) or to indicate the exact target  
12 location (high spatial demand). Univariate alpha lateralization magnitude was neither  
13 affected by perceptual load nor by spatial demand. However, an analysis of onset latencies  
14 revealed that alpha lateralization emerged earlier in low (vs. high) perceptual load trials as  
15 well as in low (vs. high) spatial demand trials. Finally, we trained a classifier to decode the  
16 specific target location based on the multivariate alpha power scalp topography. A  
17 comparison of decoding accuracy in the low and high spatial demand conditions suggests  
18 that the amount of spatial information present in the scalp distribution of alpha-band power  
19 increases as the task demands a higher degree of spatial specificity. Altogether, the results  
20 offer new insights into how the dynamic adaption of alpha-band oscillations in response to  
21 changing task demands is associated with post-stimulus attentional processing.

22 *Keywords: alpha oscillations, EEG, multivariate pattern analysis, selective attention, spatial*  
23 *specificity, sound localization*

## 24 **1. Introduction**

25 In everyday environments, containing multiple competing sensory inputs, focusing spatial  
26 attention on relevant information while ignoring or suppressing irrelevant information is  
27 crucial to engage in goal-directed behaviour. Consistently, covert shifts of spatial attention  
28 have been shown to improve various aspects of behavioural performance, including visual  
29 spatial acuity (reviewed by Anton-Erxleben & Carrasco, 2013), contrast sensitivity (Carrasco,  
30 Penpeci-Talgar, & Eckstein, 2000), or the rate of information accumulation (Carrasco &  
31 McElree, 2001). On the electrophysiological level, asymmetric modulations of parieto-  
32 occipital alpha-band power present a robust signature of spatial attentional orienting.  
33 Typically, alpha-band power decreases contralateral to the attended location and / or  
34 increases over ipsilateral scalp sites. This phenomenon of alpha power lateralization has  
35 been found in response to anticipatory shifts of attention (Foxe, Simpson, & Ahlfors, 1998;  
36 Worden, Foxe, Wang, & Simpson, 2000), when retro-actively attending to working memory  
37 representations (Poch, Capilla, Hinojosa, & Campo, 2017; Schneider, Mertes, & Wascher,  
38 2016), as well as during post-stimulus attentional processing (e.g., in auditory or visual  
39 search paradigms; Bacigalupo & Luck, 2019; Klatt, Getzmann, Wascher, & Schneider, 2018b).

40         Accumulating evidence suggests that scalp-level alpha-band activity not only reflects  
41 the attended hemifield but is tuned specifically to the attended visual field location  
42 (Bahramisharif, Heskes, Jensen, & van Gerven, 2011; Rihs, Michel, & Thut, 2007). Moreover,  
43 this spatial selectivity is also reflected in the retinotopic organization of alpha sources  
44 (Popov, Gips, Kastner, & Jensen, 2019). First evidence for comparable ‘spatial tuning’ of  
45 alpha-band oscillations in the auditory domain comes from a recent study by Deng and  
46 colleagues (Deng, Choi, & Shinn-Cunningham, 2020) who found that the topographic  
47 distribution of posterior alpha-band lateralization changes monotonically as the focus of  
48 auditory spatial attention shifts in space.

49         Notably, recent evidence suggests that the degree of spatial specificity reflected in  
50 the scalp distribution of alpha-band power also depends on the current task demands  
51 (Feldmann-Wüstefeld & Awh, 2019; Voytek et al., 2017). Specifically, two studies of visual  
52 anticipatory spatial attention, using multivariate inverted encoding models (IEM),  
53 demonstrated that the spatial selectivity of alpha activity increased when participants  
54 voluntarily focused on a narrow rather than a broad region of space (Feldmann-Wüstefeld &

55 Awh, 2020) and scaled to the degree of certainty of a central cue that indicated the location  
56 of an upcoming target (Voytek et al. 2017).

57 Consistently, in an auditory spatial attention study, focusing on post-stimulus  
58 attentional processing, we found that task-demands shape the reliance on alpha-band  
59 mediated post-stimulus processing. That is, auditory post-stimulus alpha lateralization was  
60 only present in a spatially specific sound localization task, whereas it was absent in a simple  
61 sound detection paradigm (Klatt et al. 2018b, see also Deng et al. 2019). In the present  
62 study, we set out to further investigate to what extent attentional modulations of post-  
63 stimulus alpha power capture the spatial demands of a sound localization task on a more  
64 fine-grained scale. To this end, we varied both the perceptual load and the spatial demand of  
65 the task. That is, participants were asked to localize a target sound among a set of either two  
66 (low perceptual load) or four (high perceptual load) concurrently presented sounds in a  
67 lateralized sound array. In separate task blocks, they either indicated (a) whether the target  
68 was present on the left or the right side (i.e., two response options, low spatial demand) or  
69 (b) reported the exact target location (i.e., four response options, high spatial demand). On  
70 the behavioural level, we expected that high perceptual load (compared to low load) and  
71 high spatial demand (compared to low spatial demand) would present the more challenging  
72 listening situation, resulting in slower response times and lower sound localization accuracy.  
73 Beyond that, attempting to replicate previous results, we hypothesized that post-stimulus  
74 modulations of alpha-band power should index the attended target location, while the  
75 magnitude thereof should not be affected by perceptual load (Klatt et al., 2018b). This  
76 should be evident in a hemispheric lateralization of alpha-band power over parieto-occipital  
77 electrode sites in both low and high perceptual load trials.

78 Further, the critical aim of this study was to assess whether the required degree of  
79 behavioural spatial specificity (low vs. high spatial demand) affects the spatial specificity of  
80 the alpha power signal. If this is the case, this should be either evident in a modulation of  
81 alpha lateralization magnitude and / or captured by the scalp distribution of alpha-band  
82 power. Hence, we applied both univariate as well as multivariate analysis techniques to  
83 evaluate alpha-band power modulations depending on the spatial (and perceptual) demands  
84 of the task. Finally, we assessed alpha lateralization onset latencies to explore whether the  
85 time course of alpha-band activity is likewise modulated by the required degree of spatial  
86 specificity or perceptual load. Specifically, if slower sound localization performance in high

87 spatial demand or high perceptual load conditions coincides with slower post-stimulus  
88 attentional processing, this should be reflected in delayed onset latencies of alpha  
89 lateralization. Such a time-resolved modulation of attentional alpha-band activity is, for  
90 instance, suggested by Foster and colleagues (Foster, Sutterer, Serences, Vogel, & Awh,  
91 2017), who showed that the onset latency of location-selective alpha-band channel tuning  
92 functions (reconstructed from the topographic distribution of alpha-band oscillatory power)  
93 occurred later in time for trials with slow compared to fast responses as well as for a hard  
94 compared to an easier search condition.

95

## 96 **2. Methods**

### 97 *2.1 Ethics statement*

98 The study was approved by the Ethical Committee of the Leibniz Research Centre for  
99 Working Environment and Human Factors and conducted in accordance with the Declaration  
100 of Helsinki. All participants provided written informed consent prior to the beginning of the  
101 experimental procedure.

102

### 103 *2.2 Participants*

104 19 participants were recruited to take part in the study. Hearing acuity was assessed using a  
105 pure-tone audiometry (Oscilla USB 330; Inmedico, Lystrup, Denmark), presenting eleven  
106 pure-tone frequencies in-between 125 Hz and 8000 Hz. One participant had to be excluded  
107 due to a unilateral, mild to moderate hearing impairment in the right ear (hearing thresholds  
108 of up to 35 – 50 dB hearing level). All other participants showed no signs of hearing  
109 impairment (hearing thresholds  $\leq$  25 dB). Another participant did not correctly follow the  
110 task instructions and was also excluded. Thus, the final sample included 17 subjects (mean  
111 age 23.29 years, age range 19- 30, 9 female), all of which were right-handed as indicated by  
112 the Edinburgh Handedness Inventory (Oldfield, 1971). The sample size we aimed at was  
113 chosen to be comparable to previous publications from the lab that investigated similar  
114 electrophysiological measures (e.g., Klatt, Getzmann, Wascher, & Schneider, 2018b, 2018a).  
115 All participants had normal or corrected-to-normal vision, reported no history of or current  
116 neurological or psychiatric disorders and received course credit or financial compensation  
117 (10€/hour) for their participation.

118

## 119 2.2 Experimental setup and stimuli

120 The experiment was conducted in a dimly illuminated, anechoic, and sound-attenuated  
121 room ( $5.0 \times 3.3 \times 2.4\text{m}^3$ ). Pyramid-shaped foam panels on ceiling and walls and a woolen  
122 carpet on the floor ensure a background noise level below 20dB(A). Participants were seated  
123 in a comfortable chair with their head position held constant by a chin rest. A semicircular  
124 array of nine loudspeakers (SC5.9; Visaton, Haan, Germany) was mounted in front of the  
125 subject at a distance of ~1.5 meters from the subject's head and at a height of ~1.3 meters  
126 (approximately at ear level). Only five loudspeakers, located at azimuthal positions  
127 of  $-90^\circ$ ,  $-30^\circ$ ,  $0^\circ$ ,  $30^\circ$ , and  $90^\circ$  respectively, were used for the present experimental setup. A  
128 red, light-emitting diode (diameter 3 mm) was attached right below the central loudspeaker.  
129 The diode remained turned off during the experiment, but served as a central fixation target.

130 As sound stimuli, eight familiar animal vocalizations ('birds chirping', 'dog barking',  
131 frog croaking', 'sheep baaing', 'cat meowing', 'duck quacking', 'cow mooing', 'rooster  
132 crowing') were chosen from an online sound archive (Marcell, Borella, Greene, Kerr, &  
133 Rogers, 2000). The original sounds were cut to a constant duration of 600 ms (10 ms on/off  
134 ramp), while leaving the spectro-temporal characteristics unchanged. The overall sound  
135 pressure level of the sound arrays, containing either two or four concurrently present  
136 sounds, was about 63 dB(A) and 66 dB(A), respectively. The target sounds, presented in  
137 isolation from a central position, had a sound pressure level of 60 dB(A).

138

## 139 2.3 Procedure, task, and experimental design

140 The experiment consisted of an auditory search paradigm implementing a sound localization  
141 task. The sequence of events in a given trial is depicted in Figure 1. Each trial began with a  
142 silent period of 500 ms. Then a sound stimulus (i.e., a target cue) was presented from a  
143 central position ( $0^\circ$  azimuth angle) for 600 ms, indicating which animal vocalization will serve  
144 as a relevant target sound in a given trial. The latter was followed by a 1000 ms silent inter-  
145 stimulus-interval and a sound array (600 ms). The sound array contained either two (i.e., *low*  
146 *perceptual load*, 50%) or four (i.e., *high perceptual load*, 50%) simultaneously present  
147 lateralized sound stimuli. Sound array presentation was followed by a 1600 ms response  
148 interval and a 300 ms silent interval. In total, each trial lasted for 4600 ms.

149 In low perceptual load trials, the two sounds could occur at either of the four  
150 lateralized loudspeaker positions ( $-90^\circ$ ,  $-30^\circ$ ,  $30^\circ$ ,  $90^\circ$  azimuth), with the restriction that the

151 two sounds (i.e., the target and a non-target sound) were always present in different hemi-  
152 fields. Accordingly, in high perceptual load trials all four lateralized active loudspeakers (-90°,  
153 -30°, 30°, 90° azimuth) were used. Depending on the task condition, participants received  
154 slightly different task instructions: In the *low spatial demand (lsd)* condition, participants  
155 were instructed to indicate whether the target sound was present on the left versus right  
156 side (i.e., two response options: left vs. right) or to withhold their response if the target  
157 sound was not present (i.e., target-absent trials). In the *high spatial demand (hsd)* condition,  
158 participants were asked to indicate the exact target location (i.e., four response options:  
159 inner-left, outer-left, inner-right, outer-right) or to withhold their response if the target  
160 sound was not present. Target-absent trials were included to ensure that selectively listening

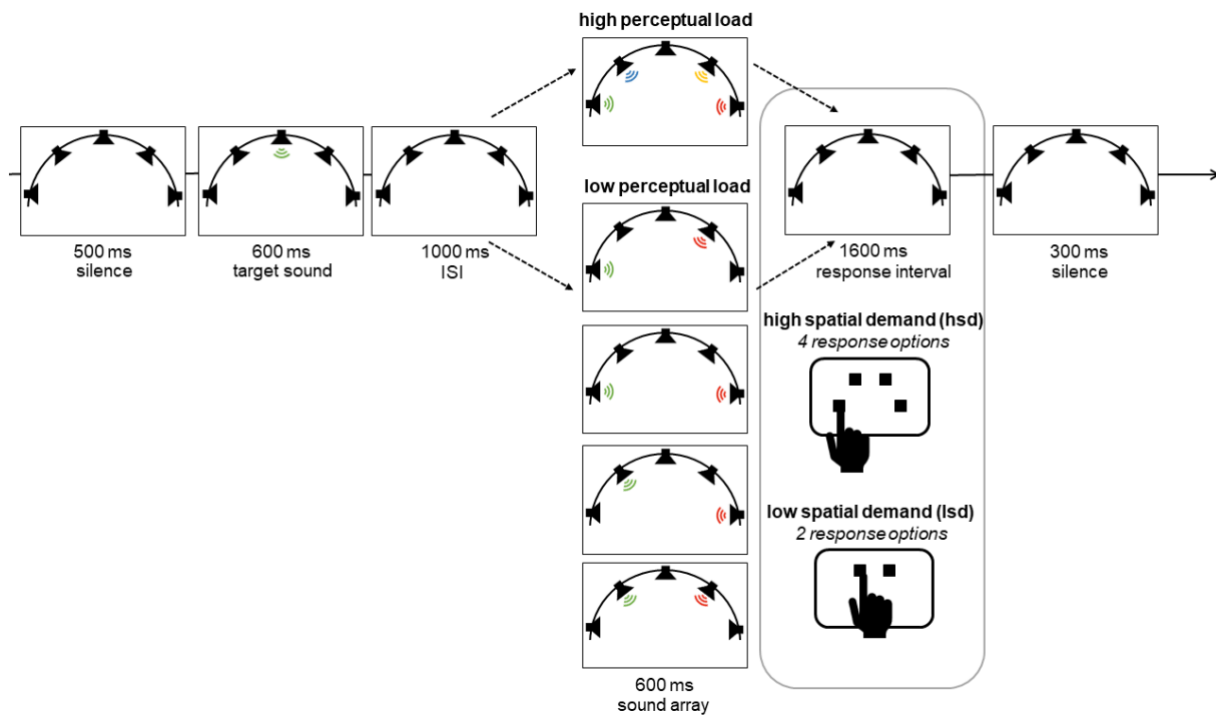

**Figure 1. Schematic illustration of the experimental design.** A centrally presented target cue indicated the relevant target in a given trial. Then, a sound array appeared, containing either two or four simultaneously present sounds from lateralized positions. In different task blocks, participants were asked to either indicate whether the target was presented on the left or the right side (low spatial demand) or to report the exact target location (high spatial demand). In both task blocks, it was also possible that the sound array did not contain the target (i.e., target-absent trial). In this case, participants withheld their response. ISI = inter-stimulus-interval.

161 to the input from only one side of the stimulus array (i.e., left or right) presented no viable  
162 strategy in low spatial demand task blocks. Specifically, if the sound array always contained a  
163 target sound in low spatial demand blocks, subjects could be inclined to simply infer that the  
164 target was located on the left side solely because they didn't perceive it on the right side (or  
165 vice versa).

166 Participants indicated their response by pressing one out of four buttons, arranged in a semi-  
167 circular array on a response pad. In the high-spatial demand condition, each button  
168 corresponded to one of the loudspeaker positions, such that participants had to press the  
169 left-most button when the target was presented at the left-most loudspeaker and so on. In  
170 low spatial demand trials, participants only used the two inner response buttons (i.e., the  
171 left button for left-target responses, the right button for right-target responses). Participants  
172 were instructed to always respond as accurately and as fast as possible, using the index  
173 finger of their right hand. To minimize horizontal eye movements during the EEG-recording,  
174 participants were instructed to fixate a centrally positioned LED.

175 Each of the spatial demand conditions (i.e., low vs. high spatial demand) consisted of  
176 672 trials, containing both low (50%) and high (50%) perceptual load trials in randomized  
177 order. Short, self-paced breaks after every 224 trials and in-between conditions were  
178 conducted to prevent fatigue. The order of conditions was counterbalanced across  
179 participants, such that  $n = 8$  subjects first completed the low-spatial demand condition and  $n$   
180  $= 9$  subjects first completed the high-spatial demand condition. Prior to the beginning of  
181 each condition participants completed 40 practice trials to familiarize with the task. All  
182 participants were presented with the same semi-randomized selection of trials. Critically, in  
183 both spatial demand conditions the same selection of 672 trials was presented, but in a  
184 different, randomized order. This assured that all differences between conditions could be  
185 ascribed to the task manipulations rather than differences in the stimulus materials. Each of  
186 the eight animal vocalizations served as the target equally often (i.e., 84 times per  
187 condition). In addition, the target sound appeared equally often at each of the four possible  
188 sound speaker locations (i.e., 56 times per location and perceptual load per condition). This  
189 also ensured that the number of left (1/3) vs. right (1/3) responses in low-spatial demand  
190 trials as well as the number of outer-left (1/5), inner-left (1/5), inner-right (1/5), and outer-  
191 right (1/5) responses in high-spatial demand trials was counterbalanced across subjects.  
192 Target-absent trials constituted 1/3<sup>rd</sup> and 1/5<sup>th</sup> of all trials in low and high spatial demand  
193 task blocks, respectively. The timing of the stimuli was controlled by custom-written  
194 software. Participants did not receive feedback during the experiment.

195 Taken together, the present study comprised a 2 x 2 repeated-measures design,  
196 including the within-subject factors *spatial demand* (low vs. high spatial demand) and  
197 *perceptual load* (low vs. high perceptual load). Note that there are different ways of defining



198 perceptual load (for a review see Murphy, Spence, & Dalton, 2017). Here, we refer to  
199 *perceptual load* as the number of items in the search display.

200

## 201 *2.4 EEG data acquisition*

202 The continuous EEG data were recorded from 58 Ag/AgCl passive scalp electrodes (ECI  
203 Electrocap, GVB-geliMED GmbH, Bad Segeberg, Germany) as well as from left and right  
204 mastoids. Electrode positions corresponded to the international 10-10 system. The  
205 electrooculogram (EOG) was simultaneously recorded from four additional electrodes,  
206 placed lateral to the outer canthus of each eye as well as below and above the right eye. The  
207 ground electrode was placed on the center of the forehead, right above the nasion. The  
208 average of all electrodes served as the online-reference. The data were recorded using a  
209 QuickAmp-72 amplifier (Brain products, Gilching, Germany) and digitized at a sampling rate  
210 of 1 kHz. During the preparation of the EEG cap, all electrode impedances were kept below  
211 10 k $\Omega$ .

212

## 213 *2.5 Data analysis*

214 If not stated otherwise, all data analyses were performed using custom MATLAB (R2018b)  
215 code and built-in functions from the *Statistics and Machine Learning Toolbox*. In a few  
216 specific cases, R (v3.6.1) and RStudio (v1.2.1335) were used (see references to specific R  
217 packages below). The significance of all tests was evaluated at an alpha level of .05. Because  
218 the *F*-distribution is always asymmetric, reported *p*-values associated with repeated-  
219 measures analysis of variance (ANOVA) are directional (Winter, 2011). Partial Eta Squared  
220 ( $\eta_p^2$ ) and Hedges' *g* (denotes as *g*, Hentschke & Stüttgen, 2011) are provided  
221 as standardized measures of effect size for ANOVAs and follow-up paired sample *t*-tests.

222

### 223 *2.5.1 Behavioral*

224 The behavioral parameters that were analyzed were response times (RT) and accuracy (i.e.,  
225 percentage of correct responses). Only target-present trials were considered. For accuracy  
226 measures, this selection of trials was required because in target-absent trials a correct  
227 target-absent-categorization (i.e., a volitional omission of a key press) could not be reliably  
228 dissociated from an incorrect, missing response. Mean RTs and accuracy measures per

229 subject and condition were submitted to a repeated-measures ANOVA. Spatial demand and  
230 perceptual load served as within-subject factors.

### 231 2.5.2 EEG

232 All EEG data processing was performed using the open-source toolbox EEGLAB (v14.1.2;  
233 Delorme & Makeig, 2004) in combination with custom MATLAB (R2018b) code.

234  
235 *Preprocessing.* Initially, continuous segments of -1 to +1 seconds surrounding boundary  
236 events as well as the DC offset were removed from the data. Then, the continuous EEG data  
237 were band-pass filtered, using a non-causal, high-pass and a low-pass Hamming windowed  
238 sinc FIR filter (*pop\_eegfiltnew* function). The lower edge of the frequency pass band was set  
239 to 0.1 Hz (filter order: 33000, transition band-width: 0.1 Hz, -6dB cutoff: 0.05 Hz) and the  
240 higher edge of the frequency pass band to 30 Hz (filter order: 440, transition band-width: 7.5  
241 Hz, -6dB cut-off: 33.75 Hz). Early-stage preprocessing was then performed using the PREP  
242 pipeline (Bigdely-Shamlo, Mullen, Kothe, Su, & Robbins, 2015), which essentially consists of  
243 three steps: it performs an initial clean-up, determines and removes a robust reference  
244 signal, and interpolates bad channels with a low signal to noise ratio. For an extensive  
245 documentation of the single steps, please see Bigdely-Shamlo et al. (2015). Only scalp EEG  
246 channels were used for evaluation of noisy channels and for computation of the robust  
247 reference, while all channels (including mastoids and EOG channels) were re-referenced. On  
248 average, 3.7 channels (SD = 2.2) were identified as bad and interpolated prior to subtracting  
249 the computed “true” reference. This includes a total of three channels (across two subjects)  
250 that were manually interpolated prior to running the PREP algorithm, because the latter did  
251 not identify the respective channels as flat channels. For channel interpolation, the PREP  
252 pipeline applies spherical spline interpolation as implemented in the *eeg\_interp()* function  
253 (Perrin, Pernier, Bertrand, & Echallier, 1989). The same algorithm was used to manually  
254 interpolate the three channels that were not identified as flat channels by the PREP  
255 algorithm. A total of three channels (in two subjects) belonging to the posterior electrode  
256 cluster of interest that was used for statistical analysis (see section on *Alpha Laterlization*)  
257 were marked as bad and thus, interpolated during this procedure.

258 For artifact rejection, an independent component analysis (ICA) was run on the  
259 dimensionality reduced data (using a basic PCA implementation). To speed up and improve

260 ICA decomposition, the continuous data were down-sampled to 200 Hz and high-pass  
261 filtered at 1 Hz (Winkler, Debener, Muller, & Tangermann, 2015), using a non-causal  
262 Hamming windowed sinc FIR filter (filter order: 3300, transition band-width: 1 Hz, -6dB  
263 cutoff: 0.5 Hz) prior to running the ICA algorithm. Then, data epochs were extracted, ranging  
264 from -1000 to 4500 ms relative to target cue onset. In addition, major artefacts and  
265 extremely large potential fluctuations were removed before running ICA, using the  
266 automatic trial-rejection procedure implemented in EEGLAB (i.e., function *pop\_autorej*). The  
267 latter rejects data epochs, containing data values exceeding a given standard deviation  
268 threshold by means of an iterative procedure (probability threshold: 5 SD, maximum  
269 proportion of total trials rejection per iteration: 5%, threshold limit: 500  $\mu$ V). Because  
270 interpolating channels prior to ICA introduces rank-deficiency, the number of to-be  
271 extracted ICs was manually reduced by the number of interpolated channels + 1 (to account  
272 for the dependency introduced by the average reference). The obtained ICA decomposition  
273 was back-projected onto the original, continuous dataset (band-pass filtered and re-  
274 referenced) with a 1 kHz sampling rate. The latter was segmented into epochs ranging from -  
275 1000 to 4500 ms relative to target cue onset and baseline-corrected, using the pre-stimulus  
276 period of -200 to 0. To identify artefactual independent components (ICs), the EEGLAB plug-  
277 in ICLabel (v1.1, Pion-Tonachini, Kreutz-Delgado, & Makeig, 2019), was applied. ICLabel  
278 assigns a label vector to each IC, indicating the probability that an IC belongs to any of seven  
279 possible categories: brain, muscle, eye, heart, line noise, channel noise, or other. All ICs that  
280 received a probability estimate below 50% for the brain category were considered  
281 “artefactual” and subsequently subtracted from the data. On average 34.82 ICs (SD = 4.26)  
282 were removed per participant (i.e., 59.67 %, SD = 7.85). Finally, the automatic trial rejection  
283 procedure implemented in EEGLAB was performed, setting the probability threshold to 5 SD,  
284 the maximum proportion of total trials to-be-rejected per iteration to 5 % and the threshold  
285 limit to 1000  $\mu$ V. On average, 177 (lsd-low, SD = 23), 182 (lsd-high, SD = 20), 162 (hsd-low, SD  
286 = 19), and 166 (hsd-high, SD = 18) *target-present-trials* passed artefact correction per  
287 subject. Specifically, 174 (lsd-low, SD = 22), 160 (lsd-high, SD = 20), 156 (hsd-low, SD = 18),  
288 and 136 (hsd-high, SD = 19) of those target-present trials were correct trials, and thus  
289 entered the univariate EEG analysis. This corresponds to, on average, 87 (lsd-low, SD = 11),  
290 80 (lsd-high, SD = 10), 78 (hsd-low, SD = 9), and 68 (hsd-high, SD = 10) trials per target  
291 hemifield (left vs. right).

292 *Time-frequency decomposition.* The time-frequency decomposition of the processed EEG  
293 data was computed using Morlet wavelet convolution as implemented in the build-in  
294 EEGLAB STUDY functions (i.e., *newtimef.m*). Specifically, the segmented EEG signal was  
295 convolved with a series of complex Morlet wavelets. The frequencies of the wavelets ranged  
296 from 4 Hz to 30 Hz, increasing logarithmically in 52 steps. A complex Morlet wavelet is  
297 defined as a complex sine wave that is tapered by a Gaussian. The number of cycles, that  
298 defines the width of the tapering Gaussian, increased linearly as a function of frequency by a  
299 factor of 0.5. This procedure accounts for the trade-off between temporal and frequency  
300 precisions as a function of the frequency of the wavelet. The number of cycles at the lowest  
301 frequency was 3; the number of cycles at the highest frequency was 11.25. The time period  
302 in-between -400 and -100 ms relative to target cue onset served as a spectral baseline.

303

304 *Alpha power lateralization.* Spatial shifts of attention following the onset of the sound array  
305 were quantified by assessing lateralized modulations of posterior alpha-band power (8-12  
306 Hz). Specifically, the difference between contralateral and ipsilateral alpha power at a cluster  
307 of posterior electrodes, comprising PO7/8, P7/8, P3/4, and PO3/4, was calculated separately  
308 for each condition and each subject. The selection of electrodes was based on previous  
309 studies of post-stimulus, posterior alpha lateralization (Klatt, Getzmann, Begau, & Schneider,  
310 2019; Schneider, Göddertz, Haase, Hickey, & Wascher, 2019), except that P5/P6 were not  
311 part of the present electrode setup and thus, electrodes P3/4 were included in the electrode  
312 cluster instead. Given that post-stimulus alpha power asymmetries have been shown to  
313 appear as a relatively long-lasting, sustained effect (Klatt et al., 2018a), the mean  
314 contralateral-minus-ipsilateral differences in power were extracted in a broad 400 ms-time  
315 window, ranging from 532 to 937 ms following sound array onset. The time window was set  
316 around the peak in the grand average contralateral minus ipsilateral difference waveform  
317 across all conditions and subjects. The peak was defined as the point in time at which the  
318 difference waveform (following sound array onset, 1600 ms – 3000 ms) reached its most  
319 negative amplitude value. The resulting analysis time window is consistent with our earlier  
320 work (Klatt et al., 2018a). Notably, although this approach to determine the analysis time  
321 window is data-driven, the comparisons between conditions remain unbiased (Luck &  
322 Gaspelin, 2017). The mean power values per subject and condition were then submitted to a  
323 repeated-measures ANOVA, including the within-subject factors *spatial demand* and

324 *perceptual load* to assess their effect on alpha lateralization magnitude.

325

326 *Alpha lateralization onset latencies.* To quantify alpha lateralization onset latency, we used a  
327 combination of the fractional area technique (Kiesel, Miller, Jolicœur, & Brisson, 2008; Luck,  
328 2014) and a jackknife approach (Luck, 2014; Miller, Patterson, & Ulrich, 1998). That is, for  
329 each condition,  $n$  subaverage contralateral minus ipsilateral difference waveforms were  
330 created, using a subsample of  $n-1$  waveforms (i.e., each participant was omitted once). In  
331 each of these subaverage waveforms, the point in time at which the negative area under the  
332 curve reached 20% and 50%, respectively (i.e., Fractional Area Latency, denoted as FAL) was  
333 measured, using the MATLAB function *latency.m* by Liesefeld (2018). Negative area was  
334 measured relative to zero and in-between a broad time window from 1600 to 3000 ms post-  
335 cue-onset (i.e., 1600 ms corresponds to sound array onset). Note that reported mean  
336 latency differences (denoted as  $D$ ) correspond to the differences in onset latency between  
337 conditions, measured in the condition-grand averages. According to Miller, Patterson, &  
338 Ulrich (1998), the jackknife-based  $SE_D$  was calculated as follows:

339

$$340 \quad SE_D = \sqrt{\frac{N-1}{N} \sum_{i=1}^N (D_{-i} - \bar{J})^2}.$$

341

342  $D_{-i}$  (for  $i = 1, \dots, N$ , with  $N$  representing the sample size) denotes the latency difference for  
343 the subsample, including all subjects except for subject  $i$ .  $\bar{J}$  is the mean difference across all  
344 subsamples (i.e.,  $\bar{J} = \sum D_{-i} / N$ ).

345 The 20%-FAL and 50%-FAL values were submitted to separate repeated-measures  
346 ANOVAs, including the within-subject factors *spatial demand* and *perceptual load*. Because  
347 the use of subsample average measures artificially reduces the error variance, the error  
348 terms in the respective ANOVA will be underestimated, while the F-values will be  
349 overestimated. To account for this bias, the  $F$ -correction according to Kiesel, Miller, Jolicœur,  
350 & Brisson (2008) was applied. Corrected  $F$ -values are denoted as  $F_{corr}$ . The corresponding  $p$ -  
351 value for the corrected  $F$  statistic was computed using the online calculator by Soper (2020).

352 Please note that the main aim of the present analysis of onset latency measures was  
353 to assess differences in onset latency between the experimental conditions. However, the  
354 estimated onset latency measures should not be interpreted as reflecting the true onset

355 time of the underlying attentional process. This precaution applies for two reasons: First, the  
356 temporal resolution of event-related spectral perturbations is considerably lower compared  
357 to standard ERP analysis. Second, non-causal filters, as applied here to the continuous raw  
358 EEG data, have been shown to affect the onset latency of time-series data considerably  
359 (VanRullen, 2011, but see also Rousselet, 2012). Critically, as the filter should affect all  
360 conditions to the same extent, the differences between conditions can still be reliably  
361 interpreted.

362

363 *Brain-behavior correlations.* To investigate to what extent the timing of alpha lateralization  
364 was related to behavioral performance, we used a repeated-measures correlation approach  
365 and the R package *rmcorr* (Bakdash & Marusich, 2017). *Rmcorr* determines “the relationship  
366 between [...] two continuous variables, while controlling for the [...] between-participants  
367 variance” (Bakdash & Marusich, 2017, p. 3). We obtained FAL-measures from the single-  
368 subject waveforms (i.e., contralateral minus ipsilateral alpha power) for each of the four  
369 conditions and correlated those with condition-specific mean response times. Here, the  
370 latter were estimated, including only the (correct) trials that remained after EEG-artefact  
371 rejection. Three subjects did not show an alpha lateralization effect (i.e., there was no  
372 negative area) and were thus, excluded from the correlation analysis. The repeated-  
373 measures correlation coefficient  $r_{rm}$  as well as a 95% confidence interval will be reported.  
374 The corresponding degrees of freedom are calculated as follows (Bakdash & Marusich,  
375 2017):

376

$$377 \quad df_{rmcorr} = N(k - 1) - 1,$$

378

379 where  $k$  is the number of repeated measures per participant (i.e., 4) and  $N$  is the total  
380 number of participants (i.e., 14).

381

382 *Non-lateralized, posterior alpha power desynchronization.* Event-related desynchronization  
383 of alpha-band activity resulting in low levels of alpha power has been linked with states of  
384 high excitability and thus, is thought to reflect functional engagement and information  
385 processing (see e.g., Fukuda, Mance, & Vogel, 2015; Krause et al., 2000; Hanslmayr, Spitzer,  
386 & Bäuml, 2009). Hence, in the present study, posterior alpha ERD served as a measure of

387 cognitive task demands. Mean alpha ERD amplitude per condition and subject was measured  
388 in-between 2144 and 2244 ms relative to target cue onset (i.e., 544 – 644 ms relative to  
389 sound array onset) at electrode Pz. The time window that served as the basis for the  
390 statistical analysis was determined using a collapsed localizer approach (Luck & Gaspelin,  
391 2017). That is, we assessed the negative peak in the grand average waveform across  
392 conditions in a broad time-window from 1600 ms to 3000 ms (relative to target cue onset;  
393 i.e., the same time window used to measure the area under the curve for fractional area  
394 latency measurement). A 100 ms time window (i.e., +/- 50 ms) around the resulting peak  
395 value of 2194 ms (i.e., 594 ms following sound array onset) constituted the measurement  
396 time window. Mean alpha power values were then submitted to a repeated-measures  
397 ANOVA, including the within-subject factors *spatial demand* (high vs. load) and *perceptual*  
398 *load* (high vs. low).

399  
400 *Decoding analysis.* We attempted to decode the exact location (i.e., outer-left, inner-left,  
401 inner-right, outer-right) of the target sound based on the scalp distribution of alpha-band  
402 EEG power. The decoding procedure was applied separately for the *low* vs. the *high spatial*  
403 *demand* condition to investigate whether the ‘amount’ of spatial information reflected in the  
404 scalp topography of alpha-band power is modulated by the spatial demands of the task. The  
405 factor *perceptual load* was not considered in the decoding analysis. The decoding analysis  
406 described below was adapted from the analysis code and method provided by Bae & Luck  
407 (2018). For the present decoding analysis, the preprocessing pipeline described above was  
408 modified as follows to retain a maximum number of trials and to prevent spurious decoding  
409 due to high-pass (van Driel, Olivers, & Fahrenfort, 2021) or low-pass (Grootswagers, Wardle,  
410 & Carlson, 2017) filtering. Specifically, the continuous data was high-pass filtered at 0.01 Hz  
411 (i.e., the cut-off that was deemed as acceptable by van Driel et al., 2021), while no low-pass  
412 filter was applied. Following ICA-based artefact correction, trials that still contained large  
413 voltage fluctuations of  $\pm 200 \mu\text{V}$  (e.g., due to muscle activity that was not removed by ICA)  
414 were rejected using the *pop\_eegthresh()* function. All other preprocessing steps were left  
415 unchanged.

416 To improve the signal-to-noise ratio, after extracting alpha power from the signal, the  
417 data belonging to a given target location category were averaged across multiple trials.  
418 These averages (rather than single-trial data) served as the input for the to-be-trained

419 classifier. The classifier was trained to discriminate between each target location and all  
420 other possible locations. To compute decoding accuracy, the classifier was then applied to  
421 the average of a set of trials for each location that was not part of the training data.  
422 Decoding was considered correct if the classifier correctly determined which one of the four  
423 possible locations was the target location. Thus, chance level decoding accuracy was at 25%.

424 Specifically, analogous to Bae & Luck (2018), the following decoding procedure was  
425 applied: The segmented EEG at all scalp electrodes was bandpass filtered at 8 to 12 Hz, using  
426 EEGLAB's *eegfilt()* function, which applies two-way least-squares finite impulse response  
427 (FIR) filtering. Then, we submitted the bandpass filtered EEG data to a Hilbert transform to  
428 obtain the magnitude of the complex analytic signal. The latter was squared to compute the  
429 total power in the alpha frequency band (i.e., 8-12 Hz) at each time point. Subsequently, to  
430 increase the efficiency of the analysis and decrease computation time, the data was  
431 subsampled, keeping only every 20<sup>th</sup> data point in-between -500 and 4500 ms relative to  
432 target sound onset (i.e., corresponding to a sampling rate of 50 Hz). This results in a 4-  
433 dimensional data matrix for each participant, including the dimensions of time (250 time  
434 points), location (4 different categories), trial (varies depending on the subject, in-between  
435 64 and 110 trials for each location), and electrode site (the 57 scalp channels). To classify the  
436 location of the target sound based on the scalp topography of the alpha power signal over  
437 the 57 scalp electrodes (i.e., mastoids and EOG electrodes were excluded), we used a  
438 combination of a support vector machine (SVM) and error-correcting output codes (ECOC;  
439 Dietterich & Balkiri, 1995). The ECOC model, implemented using the MATLAB function  
440 *fitcecoc()*, combines the results from multiple binary classifiers and thus, solves multiclass  
441 categorization problems.

442 Decoding was performed separately for each of the 250 time points in-between -500  
443 and 4500 ms relative to target sound onset. At each time point, separate trials were used to  
444 train and test classifier performance, respectively. Specifically, a threefold cross validation  
445 procedure was applied: First the data were sorted into four 'location bins', containing only  
446 trials with the same target location. In each location bin, the trials were divided into three  
447 equally sized sets of trials, each of which contained in-between 21 and 36 trials (depending  
448 on condition and subject,  $MDN_{[lsd]} = 32$ ,  $MDN_{[hsd]} = 30$ ). That is, to ensure that an equal  
449 number of trials was assigned to each of the three sets for each location bin, the minimum  
450 number of trials per subject for a given location bin was determined (denotes as  $n$ ), and  $n / 3$



451 trials were assigned to each set. In case the total trial number for a given location was not  
452 evenly divisible by three, excess trials were randomly omitted. The trials for a given location  
453 bin were averaged, resulting in a matrix of 3 (subsample averages) x 4 (location bins) x 57  
454 (electrodes) to be analyzed for each time point. Notably, two of the three subsample  
455 averages served as the training set, while the remaining group average served as a testing  
456 dataset. In the training phase, the data from the two (of the total three) subsample averages  
457 was simultaneously submitted to the ECOC model with known location labels to train four  
458 SVMs (one for each location). A one-versus-all approach was chosen such that each SVM was  
459 trained to perform a binary classification, that is, to discriminate one specific location from  
460 all other locations. Subsequently, in the test phase the unused data (i.e., the subsample  
461 average that were reserved for testing) was fed into the set of four trained SVMs to classify  
462 which of the 4 locations served as the target location in each of the subsample averages.  
463 Specifically, the MATLAB *predict()* function was used to classify the input data by minimizing  
464 the average binary loss across the four trained SVMs. Essentially, the output of the *predict()*  
465 function provides a location label for each of the two input subsample averages. By  
466 comparing the true location labels to the predicted location labels, decoding accuracy was  
467 computed.

468 This training-and-testing process was applied three times such that each subsample  
469 average served as the testing dataset once. Further, the entire procedure was iterated 10  
470 times. On each iteration, the trials in each location bin were randomly assigned to the five  
471 sets (i.e., to create new subsample averages). Finally, decoding accuracy was collapsed  
472 across the four locations, the three cycles of partitioning trials into sets, and the 10  
473 iterations, resulting in a decoding percentage for each time point. After obtaining a decoding  
474 percentage for all time points of interest, a five-point moving average was applied to smooth  
475 the averaged decoding accuracy values and to minimize noise.

476  
477 *Statistical analysis of decoding accuracy.* Although decoding was performed for all time  
478 points in-between -500 to 4500 ms relative to sound onset, the statistical analysis focused  
479 on the time interval following sound array presentation until the end of the maximal  
480 response interval (i.e., 1600 – 3800 ms relative to sound onset). We restricted the statistical  
481 analysis to this time interval because the goal was to test decoding accuracy during the post-  
482 stimulus interval (i.e., when post-stimulus attentional processing takes place). In addition,

483 because participants did not have any knowledge about *where* the target is going to appear  
484 prior to sound array onset, there should be no location-specific information present in-  
485 between target cue and sound array-onset. Briefly, the statistical analysis of decoding  
486 accuracy comprised two separate approaches: First, to confirm that the scalp topography of  
487 post-stimulus alpha-band power contains information about the target location, we  
488 compared decoding accuracy to chance level (i.e., 25% – because we used 4 locations) at  
489 each time point. This was done separately for the two spatial demand conditions. Second,  
490 we compared decoding accuracy in the low and high spatial demand condition to evaluate  
491 whether the amount of spatial information that is reflected in the scalp topography of alpha-  
492 band power is sensitive to the spatial demands of the task. At both stages, we controlled for  
493 multiple comparisons (see below for details).

494

495 *Decoding accuracy within conditions.* We used a non-parametric cluster-based permutation  
496 analysis to compare decoding accuracy to chance level (i.e., 25%) at each time point. Here,  
497 we adopted the corrected analysis code provided by Bae & Luck (2019), accounting for the  
498 presence of autocorrelated noise in the data. Using one-sided one sample *t*-tests, the  
499 average decoding accuracy across subjects was compared to chance level, separately for  
500 each time-point. Because SVM decoding does not produce meaningful below-chance  
501 decoding results, a one-sided *t*-test is justified. Then, clusters of at least two adjacent time  
502 points with a significant single-point *t*-test (i.e.  $p < .05$ ) were identified. The *t*-values within a  
503 given cluster were summed, constituting the so-called cluster mass. To determine whether a  
504 given cluster mass is greater than what can be expected under the null hypothesis, we  
505 constructed a null distribution of cluster-level *t*-mass values using permutation tests.  
506 Critically, to reduce computation time, we randomly permuted the target labels at the stage  
507 of testing the decoding output, rather than prior to training the classifier. Specifically, from  
508 an array containing all possible target labels (1, 2, 3, 4), we randomly sampled an integer as  
509 the simulated response of the classifier for a given target location. If the response matched  
510 the true target value, the response was considered correct. This yields an estimate of the  
511 decoding accuracy values that would be obtained by chance if the decoder randomly  
512 guessed the target location. Critically, to reflect the temporal auto-correlation of the  
513 continuous EEG data, the same randomly sampled target position label was used for all time  
514 points in a given trial. Overall, this sampling procedure was repeated 120 times (4 locations x

515 3 cross-validations x 10 iterations) and for each time point of interest in-between 1600 ms to  
516 3800 ms. The 120 scores for each time point were averaged to obtain the mean simulated  
517 decoding accuracy, resulting in a time series of decoding accuracy values. Analogous to the  
518 procedure that was applied to the actual EEG data, the latter was smoothed using a five-  
519 point running average filter. The procedure was repeated 17 times, to obtain a simulated  
520 decoding accuracy time series for each of our 17 participants. Then, using the simulated  
521 decoding accuracy time series, the maximum cluster mass was computed, using the  
522 procedure described above. That is, if there was more than one cluster of significant  $t$ -  
523 values, the mass of the largest cluster was selected.

524 Finally, this procedure (i.e., simulating decoding accuracy that would be obtained by  
525 chance) was iterated 10,000 times to produce a null distribution of cluster mass values. For  
526 each cluster in the decoding results, the obtained cluster  $t$  mass was compared to the  
527 distribution of cluster  $t$  mass values that was constructed under the assumption that the null  
528 hypothesis is true. If the observed cluster  $t$  mass value was in the top 95% of the null  
529 distribution (i.e.  $\alpha = .05$ , one-tailed), the null hypothesis was rejected and decoding accuracy  
530 was considered above chance. Note that this procedure was separately applied to both the  
531 low spatial demand condition and the high spatial demand condition.

532 To find the  $p$ -value associated with a specific cluster, we examined where within the  
533 null distribution does each observed cluster  $t$  mass value fall. That is, the  $p$ -value was based  
534 on the inverse percentile (computed using the *invprctile()* function) of the observed cluster-  
535 level  $t$  mass within the null distribution. If the observed cluster-level  $t$ -mass value exceeded  
536 the maximum cluster-level  $t$ -mass of the simulated null distribution, the respective  $p$ -value is  
537 reported as  $p < 10^{-4}$ . The latter corresponds to the resolution of the null distribution (i.e., 1 /  
538 number of permutations).

539

540 *Decoding Accuracy in low vs. high spatial demand blocks.* To investigate, whether or not the  
541 amount of spatial information reflected by the scalp topography of alpha power differs  
542 depending on the spatial demands of the task, decoding accuracy in the two task conditions  
543 was compared, using a cluster-corrected sign-permutation test. To this end, the  
544 *cluster\_test()* and *cluster\_test\_helper()* functions provided by Wolff, Jochim, Akyürek, &  
545 Stokes (2017) were applied. The sign-permutation test is a non-parametric test that makes  
546 no assumption of the distribution of the data. As input data, the same time window that was

547 also used for the statistical analysis of decoding accuracy within conditions was selected (i.e.,  
548 1600 – 3800 ms). Specifically, the *cluster\_test\_helper()* function generates a null distribution  
549 by randomly flipping the sign of the input data of each participant with a probability of 50%.  
550 This procedure was repeated 10,000 times. The resulting distribution served as input to the  
551 *cluster\_test()* function, identifying those clusters in the actual data that are greater than  
552 would we expected under the null hypothesis. The cluster-forming threshold as well as the  
553 cluster significance threshold were set to  $p < .05$ . Because we had a clear hypothesis  
554 regarding the direction of the effect (that is, decoding accuracy in the high spatial demand  
555 condition should be higher compared to the low spatial demand condition), the cluster-  
556 corrected sign-permutation test was one-sided.

557 In addition, to assess the overall difference in decoding ability within the post-  
558 stimulus period, the decoding accuracy was averaged across time in the approximate time  
559 window that resulted in significant within-condition decoding results (i.e., 1940 – 3340 ms)  
560 and submitted to a one-sided permutation test. To this end, the *GroupPermTest()* function  
561 provided by Wolff et al. (2017) was applied (using  $nSims = 10,000$  permutations).

562

### 563 *2.6 Data/code availability statement*

564 Stimuli and code for this study can be found at <https://osf.io/a8f6y/>. Data will be publicly  
565 stored in a Zenodo repository with restricted access. Access will be granted upon signing a  
566 data user agreement.

567

## 568 **3. Results**

### 569 *3.1 Behavioral data*

570 Behavioral results are displayed in Figure 2. The analysis of response times revealed a main  
571 effect spatial demand,  $F(1,16) = 68.75$ ,  $p < .001$ ,  $\eta_p^2 = 0.81$ , with slower responses in high  
572 spatial demand blocks ( $M = 834.79$  ms,  $SD = 92.89$ ) compared to low spatial demand blocks  
573 ( $M = 713.61$  ms,  $SD = 123.94$ ). In addition, there was a significant main effect of perceptual  
574 load,  $F(1,16) = 161.57$ ,  $p < .001$ ,  $\eta_p^2 = 0.91$ , with slower responses in high-load trials ( $M =$   
575  $843.92$  ms,  $SD = 116.19$ ) compared to low-load trials ( $M = 704.48$  ms,  $SD = 98.47$ ). For  
576 response times, there was no significant interaction of spatial demand and perceptual load,  
577  $F(1,16) = 2.59$ ,  $p = .13$ ,  $\eta_p^2 = 0.14$ . A nearly analogous pattern of results was revealed by the  
578 analysis of the percentage of correct responses. That is, participants responded more

579 accurately in low spatial demand blocks ( $M = 92.54\%$ ,  $SD = 4.63$ ) compared to high spatial  
580 demand blocks ( $M = 88.84\%$ ,  $SD = 4.80$ ),  $F(1,16) = 21.58$ ,  $p < .001$ ,  $\eta_p^2 = 0.57$ ). In addition,  
581 the percentage of correct responses was higher in low-load trials ( $M = 96.57\%$ ,  $SD = 2.72$ ),  
582 compared to high-load trials ( $M = 84.81\%$ ,  $SD = 7.32$ ),  $F(1,16) = 53.70$ ,  $p < .001$ ,  $\eta_p^2 = 0.77$ .  
583 Further, a significant interaction of spatial demand and perceptual load,  $F(1,16) = 10.78$ ,  $p =$   
584  $.005$ ,  $\eta_p^2 = 0.40$ , complements the descriptive observation that the difference in accuracy  
585 between low and high perceptual load was slightly greater in high spatial demand blocks ( $M$   
586  $= 13.66\%$ ,  $SD = 7.24$ ) than in low spatial demand blocks ( $M = 9.87\%$ ,  $SD = 6.82$ ).

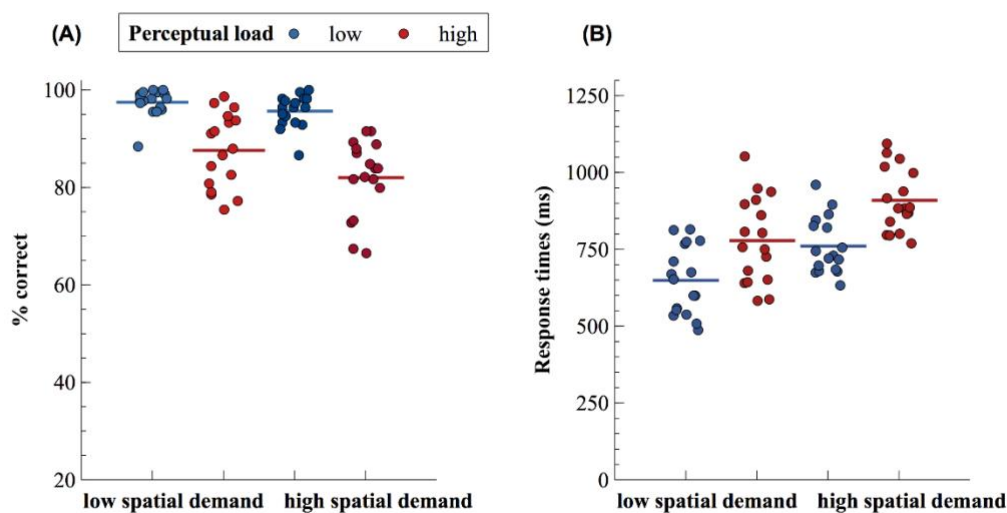

**Figure 2. Behavioral performance.** Solid, horizontal lines indicate the mean percentage of correct responses (A) or mean response times (B) in a given condition. Colored dots correspond to individual response measures. Please note that the y-axis for the % of correct responses does not originate at 0.

### 587 3.2 Alpha power lateralization

588 Figure 3A illustrates the time course of the contralateral minus ipsilateral differences in  
589 alpha power at a cluster of posterior scalp electrodes. A repeated-measures analysis of the  
590 mean alpha power amplitudes in-between 532 to 937 ms post-sound array onset revealed  
591 no significant modulation by spatial demand,  $F(1,16) = 0.04$ ,  $p = .842$ ,  $\eta_p^2 = 0.003$ , neither by  
592 perceptual load,  $F(1,16) = 0.03$ ,  $p = .862$ ,  $\eta_p^2 = 0.002$ , nor an interaction between the two  
593 factors,  $F(1,16) = 0.03$ ,  $p = 0.854$ ,  $\eta_p^2 = 0.002$ . Time-frequency plots, illustrating contralateral,  
594 ipsilateral, as well as contralateral minus ipsilateral power for a broader frequency range (4 –  
595 30 Hz) are available in the supplementary material. Further, the supplementary material  
596 includes a post-hoc analysis, including the factor target eccentricity (inner vs. outer targets).

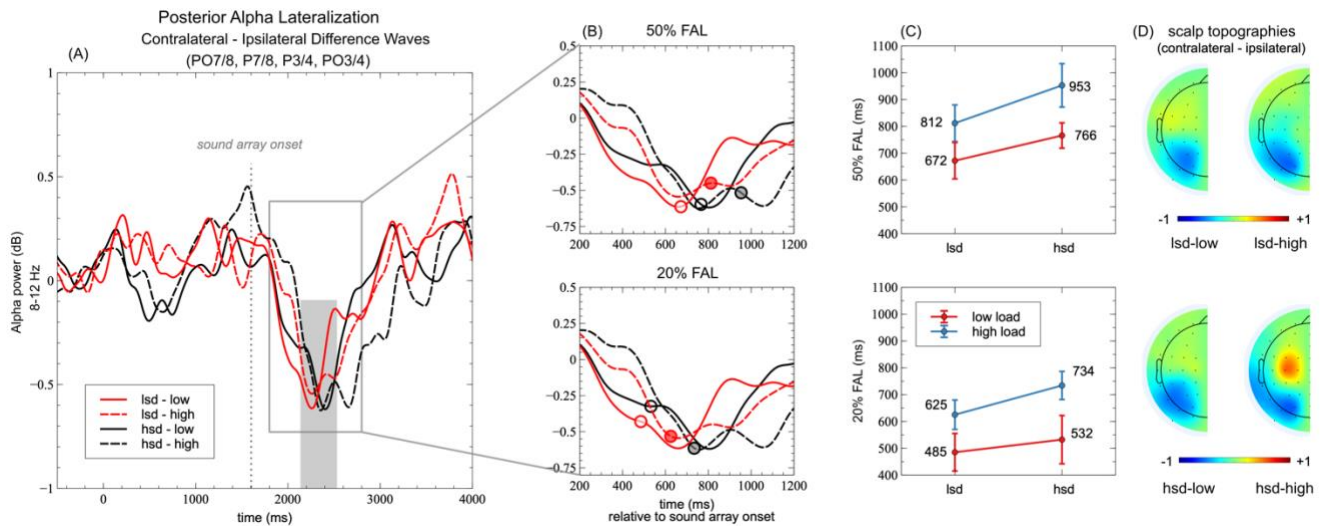

**Figure 3. Alpha Power Lateralization.** (A) Time course of contralateral minus ipsilateral differences in alpha power across a cluster of parieto-occipital scalp electrodes. The grey-filled rectangle highlights the time window used for statistical analysis of mean alpha lateralization magnitude. (B) A close-up view of the contralateral minus ipsilateral difference waveforms in-between 1800 and 2800 ms (i.e., 200 – 1200 ms relative to sound array onset). The x-axis denotes time (ms) relative to sound array onset. Circles mark the 50% (top) and 20% (bottom) fractional area latency (FAL) measures for each condition. (C) A line plot of the respective 50%-FAL (top) and 20%-FAL (bottom) values, depending on spatial demand and perceptual load. Y-axis values denote FAL relative to sound array onset. Error bars depict the standard error according to Miller et al., 1998 (formula 2). (D) Scalp topographies based on the contralateral minus ipsilateral differences in alpha power in-between 532 to 937 ms following sound array onset (i.e., the time window used for statistical analyses).

### 598 3.3 Alpha lateralization onset latencies

599 To investigate whether the time-course of alpha lateralization was affected by the task  
600 demands, we assessed alpha lateralization onset latencies. Figure 3B and C illustrate the  
601 points in time where the area under the condition-specific difference curves reaches 20%  
602 and 50%, respectively (i.e., the 20% FAL and the 50% FAL). The analysis of fractional area  
603 latency (FAL) measures revealed a significant main effect of perceptual load for the 20%-FAL,  
604  $F_{\text{corr}}(1,16) = 7.90, p = .013$ , and the 50%-FAL,  $F_{\text{corr}}(1,16) = 11.39, p = .004$ . That is, alpha  
605 lateralization emerged earlier in low perceptual load compared to high perceptual load trials  
606 ( $D_{20\%} = 171$  ms,  $SE_{D-20\%} = 60.15$ ,  $D_{50\%} = 163.5$  ms,  $SE_{D-50\%} = 48.78$ ). A significant main effect of  
607 spatial demand was only evident for the 50%-FAL,  $F_{\text{corr}}(1,16) = 4.82, p = .043$ , indicating  
608 earlier alpha lateralization onset latencies in low spatial demand blocks compared to high  
609 spatial demand blocks ( $D_{50\%} = 117.5$  ms,  $SE_{D-50\%} = 51.69$ ). There were no significant  
610 interactions (all  $F_{\text{corr}} < 0.27$ ). Alpha lateralization onset latency was not significantly related  
611 to response times,  $r_{\text{rm-20\%}}(41) = .139, p = .373, 95\% \text{ CI } [-0.18 \ 0.43]$ ,  $r_{\text{rm-50\%}}(41) = .170, p = .277,$   
612  $95\% \text{ CI } [-0.15 \ 0.453]$ .

### 613 3.4 Non-lateralized, posterior alpha power desynchronization

614 Figure 4 depicts the time-course of posterior alpha power at electrode Pz, separately for  
615 each of the four conditions. The analysis revealed a significant main effect of spatial  
616 demand,  $F(1,16) = 6.94$ ,  $p = .018$ ,  $\eta_p^2 = 0.30$ , reflecting greater alpha ERD (i.e., more negative  
617 power) in the high spatial demand condition ( $M = -3.74$  dB,  $SD = 2.48$ ) compared to the low  
618 spatial demand condition ( $M = -3.08$  dB,  $SD = 2.14$ ). While the main effect perceptual load  
619 was not significant,  $F(1,16) = 0.79$ ,  $p = .388$ ,  $\eta_p^2 = .05$ , there was a significant interaction  
620 between spatial demand and perceptual load,  $F(1,16) = 5.49$ ,  $p = .032$ ,  $\eta_p^2 = 0.26$ . Follow-up  
621 paired sample  $t$ -tests revealed that the difference between low and high perceptual load  
622 trials fell short of significance in both the low spatial demand condition,  $t(16) = 1.74$ ,  $p =$   
623  $.101$ ,  $p_{adj} = .304$ ,  $g = 0.21$ , and the high spatial demand condition,  $t(16) = -0.74$ ,  $p = .469$ ,  $p_{adj}$   
624  $= .704$ ,  $g = -0.05$ .

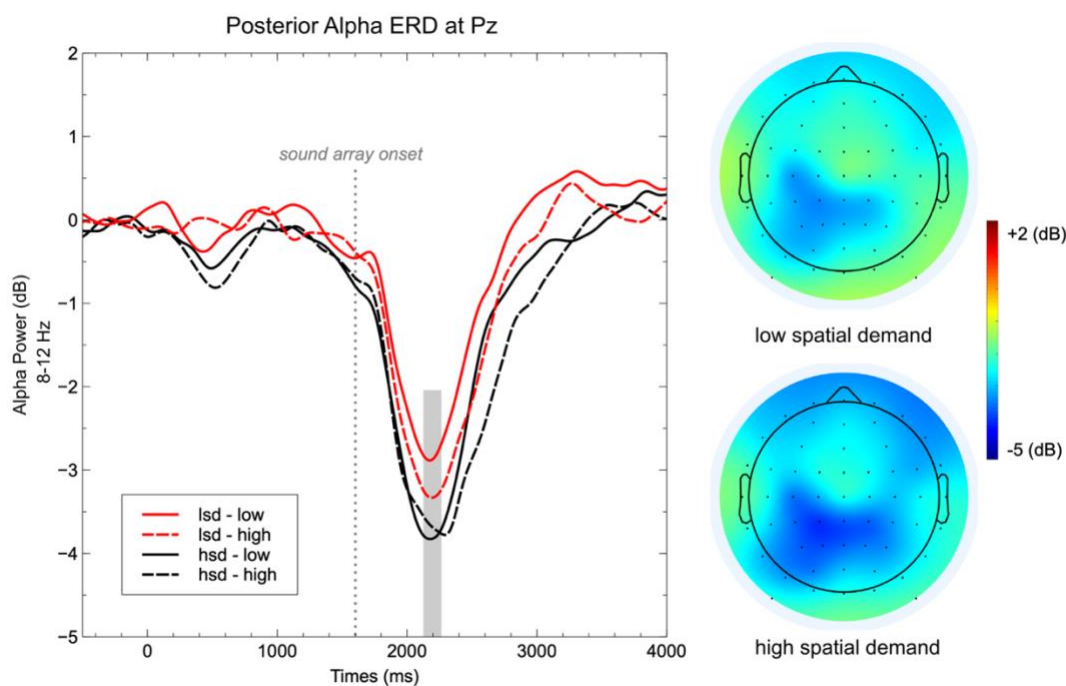

625  
626 **Figure 4. Event-related desynchronization (ERD) of alpha power at Pz.** The line plot illustrates the condition-  
627 specific averages depending on spatial demand and perceptual load. lsd-low = low spatial demand / low  
628 perceptual load, lsd-high = low spatial demand / high perceptual load, hsd-low = high spatial demand / low  
629 perceptual load, hsd-high = high spatial demand / high perceptual load. The grey rectangle indicates the  
630 approximate time window used for statistical analysis (i.e., 2144 - 2244 ms relative to target cue onset or 544 - 644  
631 ms relative to sound array onset). Scalp topographies are based on the average alpha power in the respective  
632 analysis time window.

### 633 3.5 Decoding analysis

634 We decoded the exact spatial location (i.e., outer-left, inner-left, inner-right, outer-right) of  
635 the target sound based on the scalp distribution of alpha-band EEG power. Figure 5 shows  
636 the grand average scalp topography for each target location, separately for the two spatial  
637 demand conditions (and averaged across the two perceptual load conditions). Figure 6A  
638 shows the time-course of decoding accuracy for the low vs. high spatial demand condition,  
639 as well as the difference in decoding accuracy between conditions. Decoding accuracy starts  
640 to rise above chance level (i.e., 25%) at around 1960 ms (i.e., 360 ms following sound array  
641 onset) and at first, increases continuously in both spatial demand conditions. In the low  
642 spatial demand condition, decoding accuracy reaches a peak at around 2200 ms (i.e., 600 ms  
643 post-sound onset) and then gradually decreases throughout the remainder of the response  
644 interval; in the high spatial demand condition, decoding accuracy continues to rise beyond  
645 the peak in the low spatial demand condition until around ~2360 ms (i.e., 760 ms post-  
646 sound onset). The decoding accuracy remains at this level for a couple hundred milliseconds  
647 and declines thereafter, although it remains on a higher level compared to the low spatial  
648 demand condition. Toward the end of the response interval (i.e., around 3800 ms), decoding  
649 accuracy approaches chance level in both conditions. The cluster mass test revealed that  
650 decoding was significantly greater than chance in both spatial demand conditions. We  
651 identified a significant cluster following sound array onset in each of the two conditions (all  $p$   
652  $< 10^{-4}$ , see Figure 5A, solid green and yellow lines). In the high spatial demand condition, the  
653 cluster extends from around 1980 ms to ~3340 ms relative to cue onset (i.e., ~380 – 1740  
654 ms relative to sound array onset); in the low spatial demand condition, the cluster spans a  
655 comparable time period in-between ~1940 ms and 3340 ms relative to cue onset (i.e., ~340  
656 – 1740 ms relative to sound array onset). Note, however, that cluster-based permutation  
657 test results should not be used to derive conclusions about the specific onset or offset of a  
658 certain effect (Sassenhagen & Draschkow, 2019).

659 The black, dashed line in Figure 6A illustrates the difference in decoding accuracy  
660 between the two spatial demand conditions. A cluster-corrected sign-permutation test  
661 indicated significant differences in decoding ability ( $p < .01$ , one-sided test, cluster extending  
662 from ~2340 – 2820 ms relative to cue onset, i.e., ~740 – 1220 ms relative to sound array  
663 onset), with higher decoding accuracy in the high spatial demand condition compared to the  
664 low spatial demand condition.



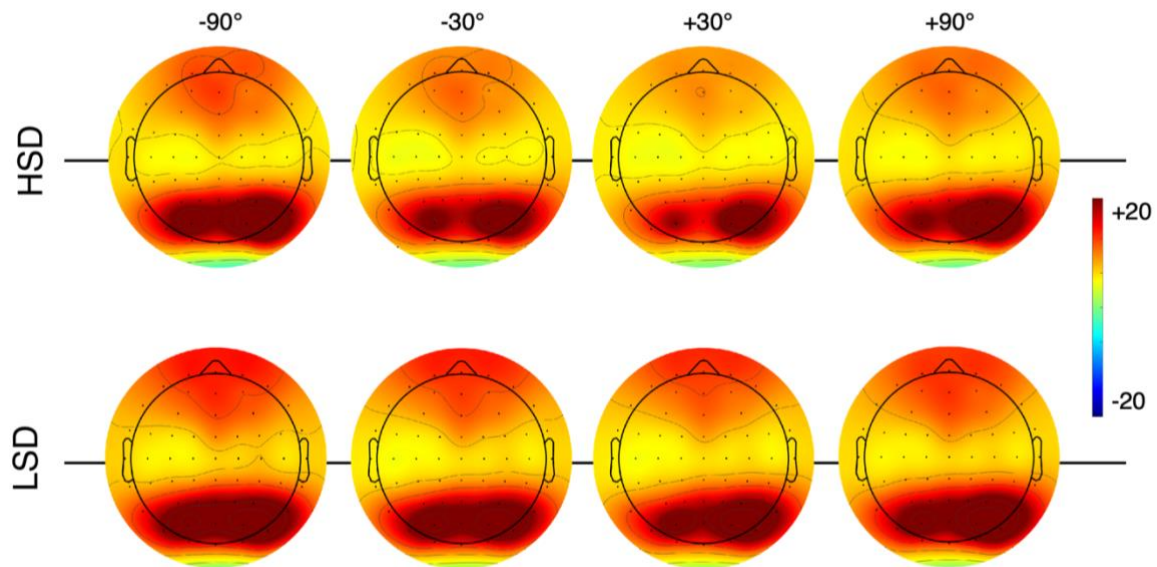

665

666 **Figure 5. Scalp topographies of instantaneous alpha power for each of the target locations.** Alpha power  
 667 was averaged across a broad time interval following sound array onset (i.e., 340 – 1740 ms post sound array  
 668 onset), averaged across subjects as well as across the two perceptual load conditions. The top row depicts the  
 669 scalp topographies for the high spatial demand (HSD) condition, the bottom row shows the low spatial demand  
 670 (LSD) condition.

671

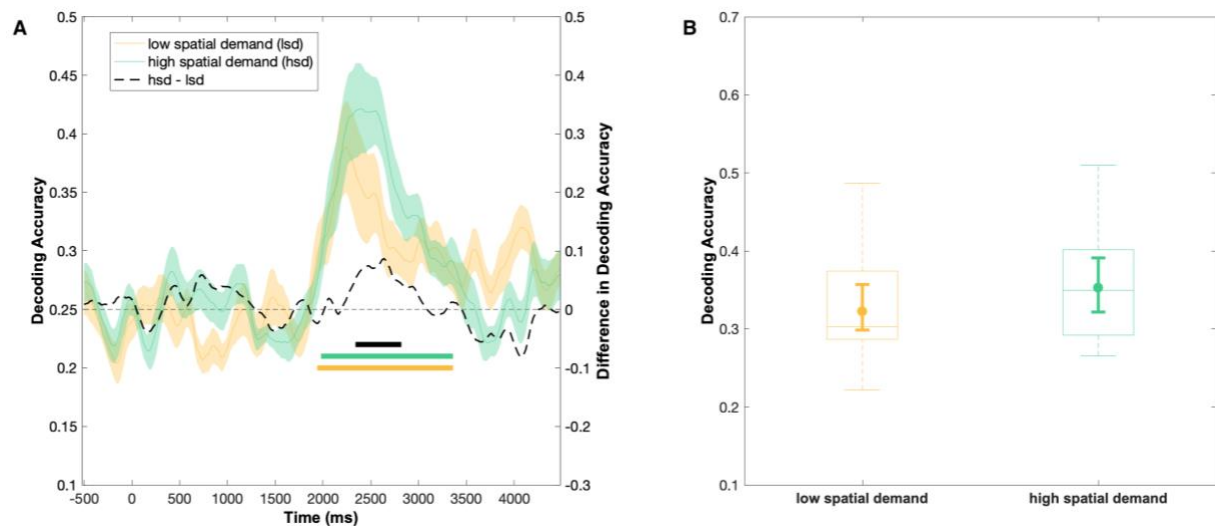

**Figure 6. Location decoding based on the multivariate scalp distribution of alpha power.** (A) Time-course of the average decoding accuracy results in the low (yellow) and high (green) spatial demand condition, respectively. The colored shading indicates  $\pm 1$  SEM. Chance-level performance (i.e., 25%) is indicated by the grey dashed horizontal line. The yellow and green solid bars indicate significant decoding of the target location in the low and high spatial demand condition, respectively. The black solid bar denotes significant differences in decoding ability between the low and the high spatial demand condition. Note that only time-points in-between 1600 – 3800 ms were considered in the statistical analysis. (B) Boxplots refer to the average decoding accuracy in-between 1940 – 3340 ms relative to cue-onset (i.e., 340 – 1740 ms following sound array onset). As per convention, boxplots illustrate the interquartile range and the median. Whiskers extent to the 1.5 times the interquartile range. The superimposed circles show the average decoding accuracy, while the corresponding error bars denote the 95% bootstrap confidence interval of the mean (number of bootstrap samples = 10000).

672 Finally, we assessed the overall difference in decoding ability within the post-stimulus  
 673 period (specifically, within the approximate time-window that resulted in above-chance  
 674 decoding accuracy within both spatial demand conditions). A one-sided permutation test of  
 675 the average decoding accuracy between 1940 – 3340 ms (i.e., 340 – 1740 ms relative to  
 676 sound array onset) consistently revealed a significant difference in decoding accuracy  
 677 between the spatial demand conditions ( $p = .002$ , Fig. 6B).

678 Notably, an additional, exploratory decoding analysis based on alpha power at parieto-  
 679 occipital scalp sites (rather than the whole scalp), returned very comparable results (see  
 680 supplementary material, S3).

681

### 682 3.6 Confusion matrices

683 To provide more detailed insights into the decoding results, here we show the confusion  
 684 matrices for each combination of target location and classification response, separately for  
 685 the high and low spatial demand condition. Figure 7 illustrates the probability of each  
 686 classification response (i.e., predicted location) for a given stimulus category (i.e., true  
 687 location), averaged over the time interval that resulted in significant within-condition  
 688 decoding performance and over participants. In both conditions, the highest probability of  
 689 classification response is evident at the true location. Interestingly, while neighboring  
 690 positions receive the most classification errors, the least confusion occurs between a true  
 691 location and the position that is in the opposite hemifield and of opposite eccentricity (e.g.,  
 692 left-out vs. right-in).  
 693

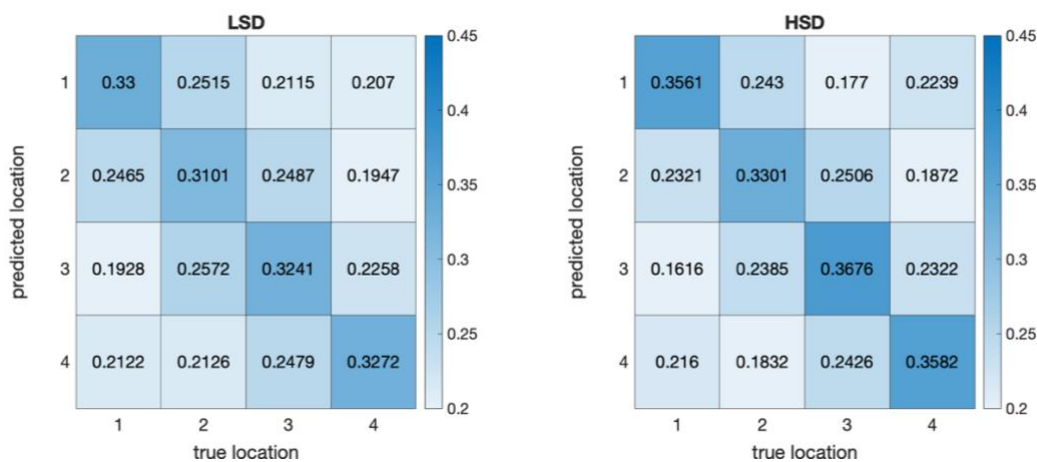

**Figure 7.** Confusion matrices for the low (LSD) and high (HSD) spatial demand condition. Each cells shows the probability of a given classification response (y-axis) for each stimulus position (x-axis), averaged across subjects and across the entire time-period that resulted in significant within-condition decoding (i.e., 1940-3340 ms relative to cue onset or respectively, 340 -1740 ms relative to sound array onset). Location labels (1-4) correspond to stimulus locations in their order of occurrence from left to right (i.e., left-out, left-in, right-in, right-out).

694 *3.7 Control analyses: eye movements*

695 The ERP signal at horizontal EOG electrodes (LO1, LO2), contralateral and ipsilateral relative  
696 to the target location, revealed asymmetric voltage differences, indicative of horizontal eye  
697 movements (see supplementary figure 3). That is, despite the instruction to fixate a central  
698 fixation point, on average, saccades toward the target sound were present. Notably,  
699 saccades appeared to occur more frequently or more strongly in the high spatial demand  
700 condition. To verify that eye movements (and the differences in eye movement between  
701 conditions) did not impact the univariate alpha lateralization or the multivariate decoding  
702 results, we performed a series of post-hoc control analyses. We briefly summarize the main  
703 results here. For details, please see the supplementary material.

704 First, to rule out that the overall presence of alpha lateralization was affected by the  
705 occurrence of horizontal eye movement, we performed an analysis of covariance (ANCOVA),  
706 including alpha lateralization magnitude as the dependent variable. The average hEOG  
707 asymmetry (contra minus ipsi) served as a covariate, spatial demand (high vs. low),  
708 perceptual load (high vs. low) and asymmetry (contra vs. ipsi) as within-subject factors.  
709 While we obtained a non-significant interaction of hEOG asymmetry and alpha asymmetry,  
710  $F(1,15) = 0.67$ ,  $p = .425$ , the main effect of alpha asymmetry remained significant,  $F(1,15) =$   
711  $12.39$ ,  $p = .003$ , after controlling for the effect of saccades.

712 Further, we assessed the potential impact of horizontal eye movements on the decoding  
713 results. An exploratory decoding analysis, using the ERP at horizontal EOG channels as input,  
714 revealed significant above-chance decoding of target location in both the low and the high  
715 spatial demand condition (see supplementary figure 4). However, the difference in decoding  
716 accuracy between the high versus low spatial demand condition did not reproduce. Further,  
717 overall decoding accuracy was lower for hEOG-based decoding compared to alpha power-  
718 based decoding. As an additional control analysis, to clarify whether the apparent  
719 differences in hEOG asymmetry between conditions systematically covary with the effect of  
720 spatial demand on alpha-power-based decoding accuracy, we performed a post-hoc  
721 ANCOVA. The average decoding accuracy in-between 1940 – 3340 ms served as the  
722 dependent variable, spatial demand (low vs. high) served as the within-subject factor, and  
723 the difference in hEOG lateralization between the spatial demand conditions (hsd minus lsd)  
724 was included as a covariate. The covariate was not significantly related to decoding accuracy,  
725  $F(1,15) = 0.52$ ,  $p = .481$ . Critically, the main effect of spatial demand was still significant after

726 controlling for the effect of saccades,  $F(1,15) = 7.14$ ,  $p = .017$ . The interaction between  
727 saccades and spatial demand was not significant,  $F(1,15) = 0.03$ ,  $p = 0.855$ . Overall, this  
728 suggests that the higher decoding accuracy in high spatial demand conditions is not caused  
729 by a potential impact of horizontal eye movements.

#### 730 **4. Discussion**

731 Sensory stimuli and behavioral demands are constantly subject to change, requiring the  
732 attentive brain to adapt its response to accommodate to those changes. In this study, we  
733 investigated the effects of varying perceptual load and spatial demand in a sound  
734 localization task on post-stimulus alpha-band oscillations. The notion that alpha-band  
735 oscillations track the currently attended location in a spatially fine-tuned manner is relatively  
736 undisputed. However, what remains more elusive is to what degree this spatial specificity  
737 depends on the current task demands. Here, we demonstrate that the amount of spatial  
738 information reflected in the multivariate scalp distribution of alpha power increases when  
739 the task requires a precise sound localization (i.e., indicating the exact stimulus location)  
740 compared to when a rather coarse localization judgment is required (i.e., indicating the  
741 hemifield). In contrast, these task demand-dependent modulations were not captured by  
742 the magnitude of univariate parieto-occipital alpha lateralization. Rather, the time course of  
743 alpha power lateralization varied with the task demands.

744 Behaviorally, the pattern of results was consistent with the well-established observation  
745 that the detection of a target sound in a cocktail-party scenario suffers from additional  
746 concurrent stimuli in the auditory scene (Brungart & Simpson, 2007; Brungart, Simpson,  
747 Ericson, & Scott, 2001; Ericson, Brungart, & Simpson, 2004; Klatt et al., 2018b). Accordingly,  
748 in the present study, participants' responses were slower and less accurate when the sound  
749 array contained four (high perceptual load) instead of just two sounds (low perceptual load).  
750 In terms of sound localization accuracy, this difference was even more pronounced when  
751 they were asked to report the exact target location (high spatial demand) rather than the  
752 target hemifield (low spatial demand). Certainly, the present set size effect cannot be  
753 completely disentangled from the effects of energetic masking due to the acoustic overlap  
754 between the competing sound sources (cf. Murphy, Spence, & Dalton, 2017). However, most  
755 critical for the intended EEG analysis was the manipulation of spatial demand. As expected,  
756 indicating the exact sound location was more challenging (i.e., slower and less accurate) than

757 simply determining whether the target was present in the left or right hemispace.  
758 Nevertheless, subjects still managed to perform clearly above chance level (i.e., on average >  
759 80% correct).

760

#### 761 **4.1 Decoding of auditory covert attention based on alpha power modulations**

762 The main question of the present study was: Is the difference in spatial task demands  
763 also reflected in the neural signal? Strikingly, while the classifier could reliably decode the  
764 precise target location in both spatial demand conditions, the amount of spatial information  
765 reflected in the scalp distribution of alpha-band power was higher under high spatial  
766 demand. It should be emphasized that in both spatial demand conditions, participants were  
767 presented with the exact same trials (although in randomly shuffled order). This rules out  
768 that differences between conditions were caused by bottom-up perceptual factors. Further,  
769 the confusion matrices show most classification errors for neighboring positions and the  
770 least confusion between the true target location and the location that is both within the  
771 other hemifield and on the opposite side (e.g., left-out vs. right-in). This supports the  
772 assumption that in auditory scene analysis the relative location between sounds is coded on  
773 a neural level, rather than the mere stimulus position (cf. Shiell et al., 2018).

774 The present results extend previous work, using an analogous auditory search task  
775 design, where we demonstrated that the presence of auditory post-stimulus alpha  
776 lateralization was dependent on the task-relevance of spatial information. Specifically, Klatt  
777 et al. (2018b) showed that alpha lateralization was absent in a simple sound detection task  
778 (i.e., when spatial location was completely irrelevant to the task), whereas it reliably  
779 indicated the attended location when participants were asked to localize the target. Here,  
780 we show that post-stimulus alpha oscillations are not only sensitive to such coarse  
781 manipulations of spatial relevance, but rather – when considering the multivariate activity  
782 patterns – also capture fine-grained adaptations to the required degree of spatial specificity.  
783 However, the curves reflecting decoding accuracy in the low and high spatial demand  
784 conditions do not diverge until about 600 ms following sound array onset; in addition,  
785 statistically significant differences in decoding accuracy were limited to a relatively late  
786 time-window (i.e., > 700 ms following sound array onset; cf. Figure 5A). In contrast, general  
787 decodability of spatial location increases above chance level shortly after sound array onset  
788 and persists well into the response interval. This suggests that, even though the spatial

789 demand conditions were blocked (i.e., participants knew beforehand which spatial specificity  
790 would be required), it took several hundred milliseconds to evoke changes in spatial  
791 specificity of the underlying alpha power signal. Such long latencies have also been reported  
792 with respect to voluntary adaptations of the alpha-power signal in a visual spatial cueing study  
793 paradigm, requiring participants to adopt either a narrow or a broad focus of attention in  
794 anticipation of an upcoming search array (Feldmann-Wüstefeld & Awh, 2019). In the latter  
795 study, Feldmann-Wüstefeld & Awh (2019) computed spatially selective channel tuning  
796 functions (CTF) based on the topography distribution of alpha power and assessed their  
797 slope as a measure of spatial selectivity. Notably, differences in the CTF slopes between the  
798 narrow-focus cue and the broad-focus cue only emerged at timepoints > 500 ms following  
799 cue onset. A previous study by Voytek and colleagues (Voytek et al., 2017) similarly  
800 manipulated the breadth of the attentional focus using a central cue, pointing to either the  
801 exact location the target will appear in or to an approximate region of varying size.  
802 Consistent with Feldmann-Wüstefeld & Awh (2019), an inverted encoding modeling analysis  
803 revealed that the spatial selectivity of anticipatory alpha-band activity decreased with  
804 greater uncertainty about the upcoming target's location.

805 Critically, the present results add to these previous findings in several ways: First, we  
806 demonstrate that just like preparatory attention is finely tuned and spatially sharpened  
807 depending on the task demands (Feldmann-Wüstefeld & Awh, 2019; Voytek et al., 2017), the  
808 ongoing attentional processing following search array onset is dynamically modulated  
809 depending on the required spatial specificity of the task. Further, the present findings  
810 complement a growing body of evidence, supporting the assumption that modulations of  
811 alpha oscillations represent a ubiquitous top-down controlled mechanism of spatial  
812 attention that plays a role across different attentional domains as well as across sensory  
813 modalities. Notably, the pattern that decoding accuracy increases if a more precise spatial  
814 judgment is required did fully reproduce when using only parieto-occipital channels as  
815 classifier input (cf. supplementary material). This suggests that most information that  
816 contributes to classification performance, and critically, to the difference in decoding  
817 accuracy between conditions, is present at posterior electrode sites. Overall, this is in line  
818 with the notion that parieto-occipital cortex subserves a supramodal neural circuit for spatial  
819 attention (Popov, Gips, Weisz, & Jensen, 2021).

820 In principle, the notion that attention can improve the information content of a neural  
821 code is not novel. In fact, it is well-established that attending to a spatial position or a  
822 relevant feature increases single-neuron firing rates in primary and extrastriate visual areas  
823 and can result in changes in the size and position of spatial receptive fields (reviewed by  
824 (Sprague, Saproo, & Serences, 2015). In the auditory domain, physiological recordings in cats  
825 (Lee & Middlebrooks, 2011) revealed similar sharpening of spatial tuning in auditory cortex  
826 (i.e., A1) when the animal engaged in a spatial task compared to an off-task “Idle” condition  
827 and a non-spatial periodicity detection task (for similar findings in human A1 see van der  
828 Heijden, Rauschecker, Formisano, Valente, & de Gelder, 2018). Hence, along with previous  
829 studies in the visual modality (Feldmann-Wüstefeld & Awh, 2019; Voytek et al., 2017), the  
830 present results extend these findings, showing that such “sharpening” of neural activity  
831 occurs not only in tuning functions of single neurons, but is also evident in the adaption of  
832 population-level activity patterns.

833

#### 834 **4.2 Alpha power lateralization as a temporally resolved signature of target processing**

835 In addition to the multivariate decoding analysis, we also analyzed alpha lateralization  
836 following sound array onset as a ‘classical’ univariate measure of attentional orienting (e.g.,  
837 Ikkai, Dandekar, & Curtis, 2016). In the present study, alpha lateralization magnitude did  
838 neither vary with perceptual load or spatial demand. The former observation replicates  
839 results of a previous study (Klatt et al., 2018b), finding no evidence for differences in alpha  
840 lateralization magnitude between a low-load (i.e., two-sound array) and a high-load (i.e.,  
841 four-sound array) auditory search condition. In contrast, Bacigalupo and Luck (2019)  
842 reported that target-elicited alpha lateralization in a visual search paradigm tended to  
843 increase with greater task difficulty. Thus, the authors speculate that alpha lateralization  
844 might reflect effort rather than target selection. The present findings do not seem to bolster  
845 this claim: Both the behavioral data as well as the complementary analysis of non-lateralized  
846 posterior alpha power indicate that task difficulty and required cognitive resources increased  
847 with greater spatial demand. Yet, alpha lateralization magnitude was unaffected by the  
848 experimental manipulation. An additional study by Wang, Megla, and Woodman (2021)  
849 corroborates the present results, showing that the magnitude of stimulus-induced alpha  
850 lateralization remains unaffected by an increase in the difficulty of attentional selection (e.g.,  
851 through higher distractor numerosity), while global, non-lateralized posterior alpha power

852 suppression did increase with distractor set size (experiment 1 and 2) and with greater  
853 distance between the items (experiment 3).

854         Nonetheless, the present findings do substantiate the notion that post-stimulus (or  
855 target-elicited) alpha lateralization presents an active signature of target processing in both  
856 visual (Bacigalupo & Luck, 2019) as well as auditory search (Klatt et al., 2018b). Bacigalupo  
857 and Luck (2019) further dissociate alpha lateralization from a well known ERP-signature of  
858 target individuation (i.e., the N2pc), suggesting that alpha lateralization reflects a long-  
859 lasting and ongoing attentional processing of the target. Although we do not investigate ERP  
860 correlates in the present study, a closer look at the time-course of alpha lateralization  
861 supports this assumption: on average, alpha lateralization persist beyond and in fact peaks  
862 around the time participants make their response. Different temporal characteristics of N2ac  
863 (an auditory analogue of the visual N2pc component Gamble & Luck, 2011) and alpha  
864 lateralization have recently also been observed in response to shifts of auditory attention  
865 between relevant talkers in a simulated cocktailparty scenario (Getzmann, Klatt, Schneider,  
866 Begau, & Wascher, 2020), corroborating the notion that the EEG measures reflect different  
867 attentional processes (see also Klatt et al., 2018b).

868         Contrary to alpha lateralization magnitude, alpha lateralization onset latency was  
869 linked to task demands. Specifically, alpha lateralization emerged around 165 ms earlier in the  
870 less demanding low perceptual load condition relative to the high perceptual load condition  
871 and ~115 ms earlier (50%-FAL) in the low spatial demand condition relative to the high  
872 spatial demand condition. Overall, the observed modulations of alpha lateralization onset  
873 latency are in line with a previous visual search study (Foster et al., 2017), showing that the  
874 onset of alpha-based CTFs varied with reaction times as well as search difficulty. That the  
875 latency differences reported by Foster et al. (2017) were much larger (i.e., differences of up  
876 to 440 ms) could be attributed to the fact that their search conditions differed more strongly  
877 (e.g., distractors were all identical vs. heterogenous). In sum, the present findings  
878 corroborate the claim that attentional modulations of alpha power not only track the  
879 location of covert spatial attention, but also the time-course (i.e., the latency) of post-  
880 stimulus attentional processing.

881         Finally, the clear-cut difference between univariate and multivariate measures of  
882 alpha power highlights the potential of multivariate decoding for the study of neurocognitive  
883 mechanisms. Similarly, when performing a univariate analysis of alpha power, Voytek et al.



884 (2017) did not capture the fine-grained differences in the allocation of attention (depending  
885 on the spatial certainty of a cue) that were evident in the multivariate topography of alpha  
886 power. Taken together, this illustrates the increased sensitivity of multivariate decoding  
887 techniques to reveal complex dynamics that are present in the combined signal across the  
888 scalp (Hebart & Baker, 2017).

889

## 890 **5. Conclusion**

891 In conclusion, our results show that the spatial specificity of post-stimulus alpha-band  
892 oscillations can be finely adapted depending on the spatial demands of the task. Notably,  
893 this task-dependent adaptation was only evident in the multivariate distribution of the  
894 alpha-band signal, whereas the magnitude of univariate parieto-occipital alpha lateralization  
895 did not capture those variations in perceptual load and spatial demand. Rather, alpha  
896 lateralization onset latency varied with the difficulty of the task, suggesting that the time-  
897 resolved modulation of post-stimulus alpha lateralization captures differences in the  
898 efficiency of post-attentional processing. These findings improve our understanding of the  
899 functional role of alpha oscillations for the ongoing attentional processing of complex  
900 auditory scenes and provide new insights into the attentional mechanisms underlying top-  
901 down adaptations to changing task demands.

902

## 903 **6. Competing Interests**

904 Declarations of interest: none.

905

## 906 **7. Author contributions: CRediT authors statement**

907 **Laura-Isabelle Klatt:** Conceptualization, Formal analysis, Investigation, Writing – Original  
908 Draft, Visualization, Project administration **Stephan Getzmann:** Conceptualization, Writing –  
909 Review & Editing, Supervision **Daniel Schneider:** Conceptualization, Writing – Review &  
910 Editing, Supervision

911

## 912 **8. Acknowledgements**

913 The authors would like to thank Peter Dillmann for the technical implementation of the  
914 stimulus presentation software and Tobias Blanke for technical support. Further, the authors  
915 are grateful to the lab staff, in particular to Pia Deltenre and Barbara Foschi, and their team

916 of student assistants for their help with data acquisition. In addition, many thanks go to Gi-  
917 Yeul Bae and Steven Luck as well as Michael J. Wolff and colleagues for publicly sharing their  
918 code (Bae & Luck, 2018; Wolff et al., 2017), which served as the basis for the present  
919 decoding and cluster permutation analyses.

920

## 921 **9. References**

- 922 Anton-Erxleben, K., & Carrasco, M. (2013, March). Attentional enhancement of spatial  
923 resolution: Linking behavioural and neurophysiological evidence. *Nature Reviews*  
924 *Neuroscience*. <https://doi.org/10.1038/nrn3443>
- 925 Bacigalupo, F., & Luck, S. J. (2019). Lateralized suppression of alpha-band EEG activity as a  
926 mechanism of target processing. *Journal of Neuroscience*, *39*(5), 900–917.  
927 <https://doi.org/10.1523/JNEUROSCI.0183-18.2018>
- 928 Bae, G.-Y., & Luck, S. J. (2018). Dissociable Decoding of Spatial Attention and Working  
929 Memory from EEG Oscillations and Sustained Potentials. *The Journal of Neuroscience*,  
930 *38*(2), 409–422. <https://doi.org/10.1523/JNEUROSCI.2860-17.2017>
- 931 Bae, G.-Y., & Luck, S. J. (2019). Appropriate Correction for Multiple Comparisons in Decoding  
932 of ERP Data: A Re-Analysis of Bae & Luck (2018). *BioRxiv*.  
933 <https://doi.org/10.1101/672741>
- 934 Bahramisharif, A., Heskens, T., Jensen, O., & van Gerven, M. A. J. (2011). Lateralized responses  
935 during covert attention are modulated by target eccentricity. *Neuroscience Letters*, *491*,  
936 35–39. <https://doi.org/10.1016/j.neulet.2011.01.003>
- 937 Bakdash, J. Z., & Marusich, L. R. (2017). Repeated measures correlation. *Frontiers in*  
938 *Psychology*, *8*(MAR), 1–13. <https://doi.org/10.3389/fpsyg.2017.00456>
- 939 Bigdely-Shamlo, N., Mullen, T., Kothe, C., Su, K.-M., & Robbins, K. A. (2015). The PREP  
940 pipeline: standardized preprocessing for large-scale EEG analysis. *Frontiers in*  
941 *Neuroinformatics*, *9*(June), 1–20. <https://doi.org/10.3389/fninf.2015.00016>
- 942 Brungart, D. S., & Simpson, B. (2007). Cocktail party listening in a dynamic multitalker  
943 environment. *Perception & Psychophysics*, *69*(1), 79–91.
- 944 Brungart, D. S., Simpson, B. D., Ericson, M. A., & Scott, K. R. (2001). Informational and  
945 energetic masking effects in the perception of multiple simultaneous talkers. *The*  
946 *Journal of the Acoustical Society of America*, *110*(5), 2527–2538.  
947 <https://doi.org/10.1121/1.1408946>

- 948 Carrasco, M., & McElree, B. (2001). Covert attention accelerates the rate of visual  
949 information processing. *Proceedings of the National Academy of Sciences of the United*  
950 *States of America*, 98(9), 5363–5367. <https://doi.org/10.1073/pnas.081074098>
- 951 Carrasco, M., Penpeci-Talgar, C., & Eckstein, M. (2000). Spatial covert attention increases  
952 contrast sensitivity across the CSF: Support for signal enhancement. *Vision Research*,  
953 40(10–12), 1203–1215. [https://doi.org/10.1016/S0042-6989\(00\)00024-9](https://doi.org/10.1016/S0042-6989(00)00024-9)
- 954 Delorme, A., & Makeig, S. (2004). EEGLAB: an open source toolbox for analysis of single-trial  
955 EEG dynamics including independent component analysis. *Journal of Neuroscience*  
956 *Methods*, 134(2004), 9–21. <https://doi.org/10.1016/j.jneumeth.2003.10.009>
- 957 Deng, Y., Choi, I., & Shinn-Cunningham, B. G. (2020). Topographic specificity of alpha power  
958 during auditory spatial attention. *NeuroImage*, 207, 116360.  
959 <https://doi.org/10.1016/j.neuroimage.2019.116360>
- 960 Dietterich, T. G., & Balkiri, G. (1995). Solving Multiclass Learning Problems via Error-  
961 Correcting Output Codes. *Journal of Artificial Intelligence Research*, 2, 263–286.
- 962 Ericson, M. A., Brungart, D. S., & Simpson, B. D. (2004). *Factors That Influence Intelligibility in*  
963 *Multitalker Speech Displays. The International Journal of Aviation Psychology* (Vol. 14).  
964 <https://doi.org/10.1207/s15327108ijap1403>
- 965 Feldmann-Wüstefeld, T., & Awh, E. (2019). Alpha-band activity tracks the zoom lens of  
966 attention. *Journal of Cognitive Neuroscience*, 32(2), 272–282.  
967 [https://doi.org/10.1162/jocn\\_a\\_01484](https://doi.org/10.1162/jocn_a_01484)
- 968 Foster, J. J., Sutterer, D. W., Serences, J. T., Vogel, E. K., & Awh, E. (2017). Alpha-band  
969 oscillations enable spatially and temporally resolved tracking of covert spatial attention.  
970 *Psychological Science*, 28(7), 929–941. <https://doi.org/10.1177/0956797617699167>
- 971 Foxe, J. J., Simpson, G. V., & Ahlfors, S. P. (1998). Parieto-occipital ~10 Hz activity reflects  
972 anticipatory state of visual attention mechanisms. *NeuroReport*, 9(17), 3929–3933.  
973 <https://doi.org/10.1097/00001756-199812010-00030>
- 974 Fukuda, K., Mance, I., & Vogel, E. K. (2015). A Power Modulation and Event-Related Slow  
975 Wave Provide Dissociable Correlates of Visual Working Memory. *Journal of*  
976 *Neuroscience*, 35(41), 14009–14016. <https://doi.org/10.1523/JNEUROSCI.5003-14.2015>
- 977 Gamble, M. L., & Luck, S. J. (2011). N2ac: An ERP component associated with the focusing of  
978 attention within an auditory scene. *Psychophysiology*, 48(8), 1057–1068.  
979 <https://doi.org/10.1111/j.1469-8986.2010.01172.x>

- 980 Getzmann, S., Klatt, L. I., Schneider, D., Begau, A., & Wascher, E. (2020). EEG correlates of  
981 spatial shifts of attention in a dynamic multi-talker speech perception scenario in  
982 younger and older adults. *Hearing Research*, *398*, 108077.  
983 <https://doi.org/10.1016/j.heares.2020.108077>
- 984 Grootswagers, T., Wardle, S. G., & Carlson, T. A. (2017). Decoding dynamic brain patterns  
985 from evoked responses: A tutorial on multivariate pattern analysis applied to time  
986 series neuroimaging data. *Journal of Cognitive Neuroscience*, *29*(4), 677–697.  
987 [https://doi.org/10.1162/jocn\\_a\\_01068](https://doi.org/10.1162/jocn_a_01068)
- 988 Hanslmayr, S., Spitzer, B., & Bäuml, K. H. (2009). Brain oscillations dissociate between  
989 semantic and nonsemantic encoding of episodic memories. *Cerebral Cortex*, *19*(7),  
990 1631–1640. <https://doi.org/10.1093/cercor/bhn197>
- 991 Hebart, M. N., & Baker, C. I. (2017). Deconstructing multivariate decoding for the study of  
992 brain function. *NeuroImage*, (2017).  
993 <https://doi.org/10.1016/j.neuroimage.2017.08.005>
- 994 Hentschke, H., & Stüttgen, M. C. (2011). Computation of measures of effect size for  
995 neuroscience data sets. *European Journal of Neuroscience*, *34*, 1887–1894.  
996 <https://doi.org/10.1111/j.1460-9568.2011.07902.x>
- 997 Ikkai, A., Dandekar, S., & Curtis, C. E. (2016). Lateralization in alpha-band oscillations predicts  
998 the locus and spatial distribution of attention. *PloS One*, *11*(5), e0154796.  
999 <https://doi.org/10.1371/journal.pone.0154796>
- 1000 Kiesel, A., Miller, J., Jolicœur, P., & Brisson, B. (2008). Measurement of ERP latency  
1001 differences: A comparison of single-participant and jackknife-based scoring methods.  
1002 *Psychophysiology*, *45*, 250–274. <https://doi.org/10.1111/j.1469-8986.2007.00618.x>
- 1003 Klatt, L.-I., Getzmann, S., Begau, A., & Schneider, D. (2019). A dual mechanism underlying  
1004 retroactive shifts of auditory spatial attention: dissociating target- and distractor-  
1005 related modulations of alpha lateralization. *Scientific Reports*, *10*, 13860.  
1006 <https://doi.org/10.1101/2019.12.19.882324>
- 1007 Klatt, L.-I., Getzmann, S., Wascher, E., & Schneider, D. (2018a). Searching for auditory targets  
1008 in external space and in working memory: Electrophysiological mechanisms underlying  
1009 perceptual and retroactive spatial attention. *Behavioural Brain Research*, *353*, 98–107.  
1010 <https://doi.org/10.1016/j.bbr.2018.06.022>
- 1011 Klatt, L.-I., Getzmann, S., Wascher, E., & Schneider, D. (2018b). The contribution of selective

- 1012 spatial attention to sound detection and sound localization: Evidence from event-  
1013 related potentials and lateralized alpha oscillations. *Biological Psychology*, *138*, 133–  
1014 145. <https://doi.org/10.1016/j.biopsycho.2018.08.019>
- 1015 Krause, C. M., Sillanmaki, L., Koivisto, M., Saarela, C., Haggqvist, A., Laine, M., & Hamalainen,  
1016 H. (2000). The effects of memory load on event-related (EEG) desynchronisation and  
1017 synchronisation. *Clinical Neurophysiology*, *111*, 2071–2078.  
1018 [https://doi.org/10.1016/S1388-2457\(00\)00429-6](https://doi.org/10.1016/S1388-2457(00)00429-6)
- 1019 Lee, C.-C., & Middlebrooks, J. C. (2011). Auditory Cortex Spatial Sensitivity Sharpens During  
1020 Task Performance. *Nature Neuroscience*, *14*(1), 108–114.  
1021 <https://doi.org/doi:10.1038/nn.2713>.
- 1022 Liesefeld, H. R. (2018). Estimating the Timing of Cognitive Operations With MEG / EEG  
1023 Latency Measures : A Primer , a Brief Tutorial , and an Implementation of Various  
1024 Methods. *Frontiers in Neuroscience*, *12*(October), 1–11.  
1025 <https://doi.org/10.3389/fnins.2018.00765>
- 1026 Luck, S. J. (2014). *An introduction to the event-related potential technique* (2nd ed.). MIT  
1027 Press.
- 1028 Luck, S. J., & Gaspelin, N. (2017). How to get statistically significant effects in any ERP  
1029 experiment (and why you shouldn't). *Psychophysiology*, *54*(1), 146–157.  
1030 <https://doi.org/10.1111/psyp.12639>
- 1031 Miller, J., Patterson, T., & Ulrich, R. (1998). Jackknife-based method for measuring LRP onset  
1032 latency differences. *Psychophysiology*, *35*(1), 99–115. [https://doi.org/10.1111/1469-  
1033 8986.3510099](https://doi.org/10.1111/1469-8986.3510099)
- 1034 Murphy, S., Spence, C. J., & Dalton, P. (2017). Auditory perceptual load: A review. *Hearing  
1035 Research*, *352*, 40–48. <https://doi.org/10.1016/j.heares.2017.02.005>
- 1036 Oldfield, R. C. (1971). The assessment and analysis of handedness: the Edinburgh inventory.  
1037 *Neuropsychologia*, *9*, 97–113. Retrieved from  
1038 <http://www.ncbi.nlm.nih.gov/pubmed/5146491>
- 1039 Perrin, F., Pernier, J., Bertrand, O., & Echallier, J. F. (1989). Spherical splines for scalp  
1040 potential and current density mapping. *Electroencephalography and Clinical  
1041 Neurophysiology*, *72*(2), 184–187. [https://doi.org/10.1016/0013-4694\(89\)90180-6](https://doi.org/10.1016/0013-4694(89)90180-6)
- 1042 Pion-Tonachini, L., Kreutz-Delgado, K., & Makeig, S. (2019). ICLabel: An automated  
1043 electroencephalographic independent component classifier, dataset, and website.

- 1044 *NeuroImage*, 198, 181–197. <https://doi.org/10.1016/j.neuroimage.2019.05.026>
- 1045 Poch, C., Capilla, A., Hinojosa, J. A., & Campo, P. (2017). Selection within working memory  
1046 based on a color retro-cue modulates alpha oscillations. *Neuropsychologia*, 106, 133–  
1047 137. <https://doi.org/10.1016/j.neuropsychologia.2017.09.027>
- 1048 Popov, T., Gips, B., Kastner, S., & Jensen, O. (2019). Spatial specificity of alpha oscillations in  
1049 the human visual system. *Human Brain Mapping*, (June), 1–9.  
1050 <https://doi.org/10.1002/hbm.24712>
- 1051 Popov, T., Gips, B., Weisz, N., & Jensen, O. (2021). Brain areas associated with visual spatial  
1052 attention display topographic organization during auditory spatial attention. *BioRxiv*.  
1053 <https://doi.org/https://doi.org/10.1101/2021.03.15.435371>
- 1054 Rihs, T. A., Michel, C. M., & Thut, G. (2007). Mechanisms of selective inhibition in visual  
1055 spatial attention are indexed by  $\alpha$ -band EEG synchronization. *European Journal of*  
1056 *Neuroscience*, 25(2), 603–610. <https://doi.org/10.1111/j.1460-9568.2007.05278.x>
- 1057 Rousselet, G. A. (2012). Does filtering preclude us from studying ERP time-courses? *Frontiers*  
1058 *in Psychology*, 3(MAY), 1–9. <https://doi.org/10.3389/fpsyg.2012.00131>
- 1059 Sassenhagen, J., & Draschkow, D. (2019). Cluster-based permutation tests of MEG/EEG data  
1060 do not establish significance of effect latency or location. *Psychophysiology*, 56(6),  
1061 e13335. <https://doi.org/10.1111/psyp.13335>
- 1062 Schneider, D., Göddertz, A., Haase, H., Hickey, C., & Wascher, E. (2019). Hemispheric  
1063 asymmetries in EEG alpha oscillations indicate active inhibition during attentional  
1064 orienting within working. *Behavioural Brain Research*, 359, 38–46.  
1065 <https://doi.org/10.1016/j.bbr.2018.10.020>
- 1066 Schneider, D., Mertes, C., & Wascher, E. (2016). The time course of visuo-spatial working  
1067 memory updating revealed by a retro-cuing paradigm. *Scientific Reports*, 6, 21442.  
1068 <https://doi.org/10.1038/srep21442>
- 1069 Shiell, M. M., Hausfeld, L., & Formisano, E. (2018). Activity in human auditory cortex  
1070 represents spatial separation between concurrent sounds. *The Journal of Neuroscience*,  
1071 38(21), 4977–4984. <https://doi.org/10.1523/JNEUROSCI.3323-17.2018>
- 1072 Soper, D. S. (2020). p-Value Calculator for an F-Test [Software]. Retrieved December 16,  
1073 2020, from <https://www.danielsoper.com/statcalc>
- 1074 Sprague, T. C., Saproo, S., & Serences, J. T. (2015). Visual attention mitigates information loss  
1075 in small- and large scale neural codes. *Trends in Cognitive Sciences*, 19(4), 215–226.

- 1076 <https://doi.org/10.1016/j.tics.2015.02.005>
- 1077 van der Heijden, K., Rauschecker, J. P., Formisano, E., Valente, G., & de Gelder, B. (2018).  
1078 Active sound localization sharpens spatial tuning in human primary auditory cortex.  
1079 *Journal of Neuroscience*, 38(40), 8574–8587. [https://doi.org/10.1523/JNEUROSCI.0587-](https://doi.org/10.1523/JNEUROSCI.0587-18.2018)  
1080 18.2018
- 1081 van Driel, J., Olivers, C. N. ., & Fahrenfort, J. J. (2021). High-pass filtering artifacts in  
1082 multivariate classification of neural time series data. *Journal of Neuroscience Methods*,  
1083 352, 109080. <https://doi.org/10.1101/530220>
- 1084 VanRullen, R. (2011). Four common conceptual fallacies in mapping the time course of  
1085 recognition. *Frontiers in Psychology*, 2(DEC), 1–6.  
1086 <https://doi.org/10.3389/fpsyg.2011.00365>
- 1087 Voytek, B., Samaha, J., Rolle, C. E., Greenberg, Z., Gill, N., Porat, S., ... Gazzaley, A. (2017).  
1088 Preparatory encoding of the fine scale of human spatial attention. *Journal of Cognitive*  
1089 *Neuroscience*, 29(7), 1302–1310. [https://doi.org/10.1162/jocn\\_a\\_01124](https://doi.org/10.1162/jocn_a_01124)
- 1090 Wang, S., Megla, E. E., & Woodman, G. F. (2021). Stimulus-induced alpha suppression tracks  
1091 the difficulty of attentional selection, not visual working memory storage. *Journal of*  
1092 *Cognitive Neuroscience*, 33(3), 536–562. [https://doi.org/10.1162/jocn\\_a\\_01637](https://doi.org/10.1162/jocn_a_01637)
- 1093 Winkler, I., Debener, S., Muller, K. R., & Tangermann, M. (2015). On the influence of high-  
1094 pass filtering on ICA-based artifact reduction in EEG-ERP. *Proceedings of the Annual*  
1095 *International Conference of the IEEE Engineering in Medicine and Biology Society, EMBS,*  
1096 *2015-Novem*, 4101–4105. <https://doi.org/10.1109/EMBC.2015.7319296>
- 1097 Winter, B. (2011). The F distribution and the basic principle behind ANOVAs. Retrieved from  
1098 [http://menzerath.phonetik.uni-frankfurt.de/teaching/R/bw\\_anova\\_general\\_HR.pdf](http://menzerath.phonetik.uni-frankfurt.de/teaching/R/bw_anova_general_HR.pdf)
- 1099 Wolff, M. J., Jochim, J., Akyürek, E. G., & Stokes, M. G. (2017). Dynamic hidden states  
1100 underlying working-memory-guided behavior. *Nature Neuroscience*, 20(6), 864–871.  
1101 <https://doi.org/10.1038/nn.4546>
- 1102 Worden, M. S., Foxe, J. J., Wang, N., & Simpson, G. V. (2000). Anticipatory biasing of  
1103 visuospatial attention indexed by retinotopically specific  $\alpha$ -band  
1104 electroencephalography increases over occipital cortex. *The Journal of Neuroscience*,  
1105 20(6), RC63. <https://doi.org/10.1523/JNEUROSCI.20-06-j0002.2000>
- 1106

## SUPPLEMENTARY MATERIALS FOR

### Attentional Modulations of Alpha Power Are Sensitive to the Task-relevance of Auditory Spatial Information

Laura-Isabelle Klatt, Stephan Getzmann, Daniel Schneider

*Leibniz Research Centre for Working Environment and Human Factors*

#### 1 S1. Time-Frequency Plots

2 Supplementary figure 1 illustrates contralateral, ipsilateral, as well as contralateral minus  
3 ipsilateral power at a cluster of posterior electrodes (PO7/8, P7/8, P3/4, or PO3/4) for a  
4 frequency range of 4 to 30 Hz separately for each condition. The figure confirms that  
5 lateralization effects are mostly limited to the alpha frequency range.

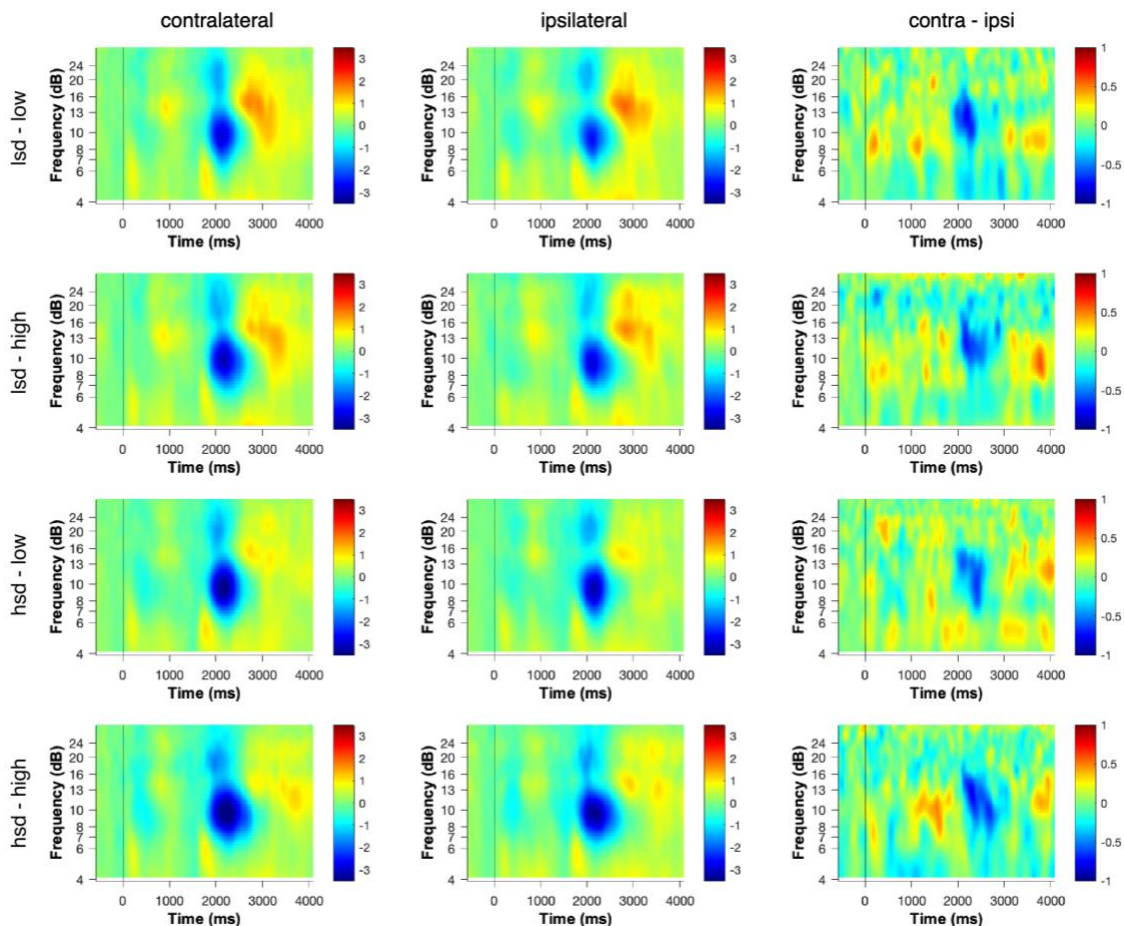

6 **Figure 1. Time-frequency plots.** Power is depicted for a frequency range of 4 to 30 Hz at electrodes contralateral  
7 (left column) and ipsilateral (middle column) to the target location as well as for the contralateral minus ipsilateral  
8 (right column) differences. The conditions are abbreviated as follows: lsd-low = low spatial demand / low  
9 perceptual load, lsd-high = low spatial demand / high perceptual load, hsd-low = high spatial demand / low  
10 perceptual load, hsd-high = high spatial demand / high perceptual load.

11



## 12 **S2. Alpha lateralization magnitude and target eccentricity**

13 Deng, Choi, and Shinn-Cunningham (2020) have previously reported that alpha lateralization  
14 is greater when attention was directed to locations further away from the central position. In  
15 the present study, targets could be likewise presented in rather close proximity to central  
16 fixation ( $\pm 30^\circ$ ) or at a greater distance ( $\pm 90^\circ$ ). We performed an addition post-hoc ANOVA,  
17 including target eccentricity (inner vs. outer target position), spatial demand, and perceptual  
18 load as within-subject factors, while mean alpha lateralization magnitude served as a  
19 dependent variable. To account for the fact that we did not have an a-priori hypothesis for all  
20 seven factor combinations in the analysis,  $p$ -values were corrected for multiple comparisons  
21 according to Benjamini & Hochberg (1995). The analysis revealed neither a significant two-  
22 way interaction of spatial demand and target eccentricity,  $F(1,16) = 1.60$ ,  $p = .22$ ,  $p_{\text{adj}} = .785$ ,  
23 nor a three-way interaction of spatial demand, target eccentricity, and perceptual load,  
24  $F(1,16) = 4.64$ ,  $p = .047$ ,  $p_{\text{adj}} = .328$ . None of the other main effects or interactions were  
25 significant (all  $p_{\text{adj}} > .79$ ).

26

## 27 **S3. Decoding based on alpha power at parieto-occipital scalp sites**

28 In previous studies that applied alpha-band decoding, results have been shown to be virtually  
29 identically for analyses including all vs. only posterior electrodes (e.g., van Moorselaar et al.,  
30 2018), suggesting that most (or even all) relevant information that contributes to decoding  
31 performance is represented in posterior electrode sites. Hence, we performed an additional,  
32 exploratory decoding analysis, using only parieto-occipital scalp sites as input to the  
33 classifier. Otherwise, all parameters in the decoding analysis were used, as described in the  
34 main analysis. Specifically, alpha power at electrodes P7, P3, P1, Pz, P2, P4, P8, PO7, PO3, POz,  
35 PO4, PO8, O1, Oz, O2, PO9, and PO10 was used as input to the classifier. Figure S3A shows  
36 the resulting time-course of decoding accuracy as well as the difference between the low and  
37 high spatial demand condition. In addition, panel B illustrates the average decoding accuracy  
38 per condition.

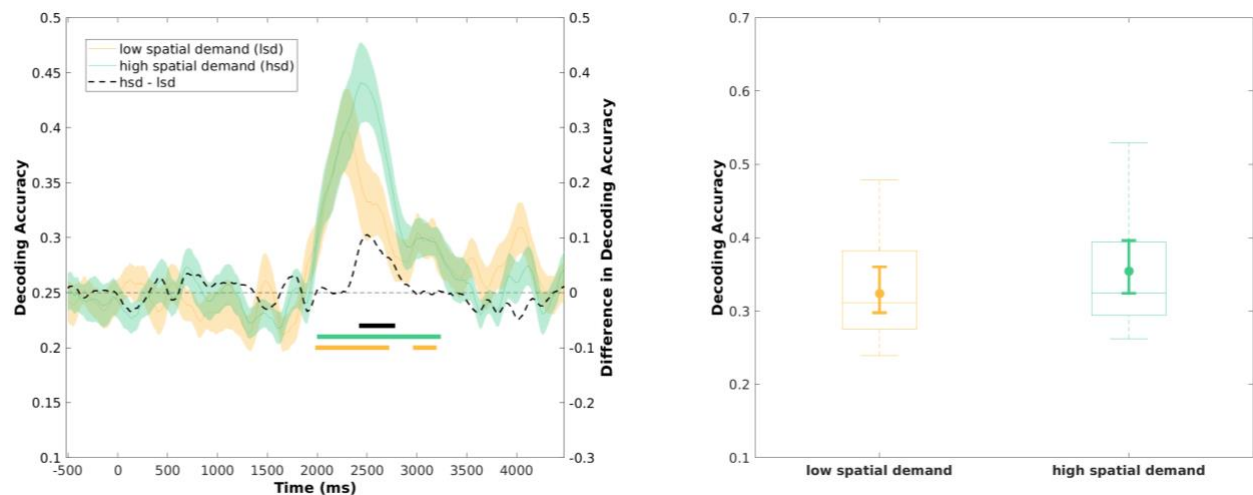

39

40 **Figure 2. Location decoding based on the scalp distribution of alpha power at posterior electrode sites. (A)**  
41 Time-course of the average decoding accuracy results in the low (yellow) and high (green) spatial demand  
42 condition, respectively. The colored shading indicates  $\pm 1$  SEM. Chance-level performance (i.e., 25%) is indicated by  
43 the grey dashed horizontal line. The yellow and green solid bars indicate significant cluster of decoding accuracy  
44 in the low and high spatial demand condition, respectively (cluster-based permutation, all  $p < .017$ ). The black  
45 solid bar denotes significant differences (cluster-corrected sign-permutation test, one-sided,  $p = .002$ ) in decoding  
46 ability between the low and the high spatial demand condition. Note that only time-points in-between 1600 –  
47 3800 ms were considered in the statistical analysis. (B) Boxplots refer to the average decoding accuracy in-  
48 between 2000 - 3240 ms relative to cue-onset (i.e., 400 – 1640 ms following sound array onset). The latter time  
49 window includes the approximate time interval that resulted in significant within-condition decoding for both  
50 conditions. As per convention, boxplots illustrate the interquartile range and the median. Whiskers extent to the  
51 1.5 times the interquartile range. The superimposed circles show the average decoding accuracy, while the  
52 corresponding error bars denote the 95% bootstrap confidence interval of the mean (number of bootstrap  
53 samples = 10000). A one-sided permutation test revealed a significant difference in the overall decoding ability  
54 between the low and high spatial demand condition,  $p = .012$ .

55

#### 56 **S4. Control analyses: eye movements**

57 We evaluated the epoched data at horizontal EOG (hEOG) electrodes. To obtain ERPs, the  
58 continuous EEG data was segmented into epochs, ranging from -1000 to 4500 ms relative to  
59 sound cue onset. For baseline correction, the 200 ms time interval prior to sound cue onset  
60 was used (i.e., -200 to 0 ms). Trials classified as premature responses (i.e., with response times  
61  $< 200$  ms) were removed. Otherwise, no preprocessing was performed.

62 Supplementary figure 3 depicts the contralateral versus ipsilateral voltages at hEOG  
63 electrodes LO1/LO2 relative to the target position. The ERP at horizontal EOG electrodes  
64 clearly indicates typical lateralized voltage differences, depending on the target position.  
65 Thus, despite the instruction to fixate the central LED, on at least a subset of trials, saccades  
66 toward the target sounds were present. Figure 3 also shows that saccades were more  
67 pronounced in the high spatial demand condition.

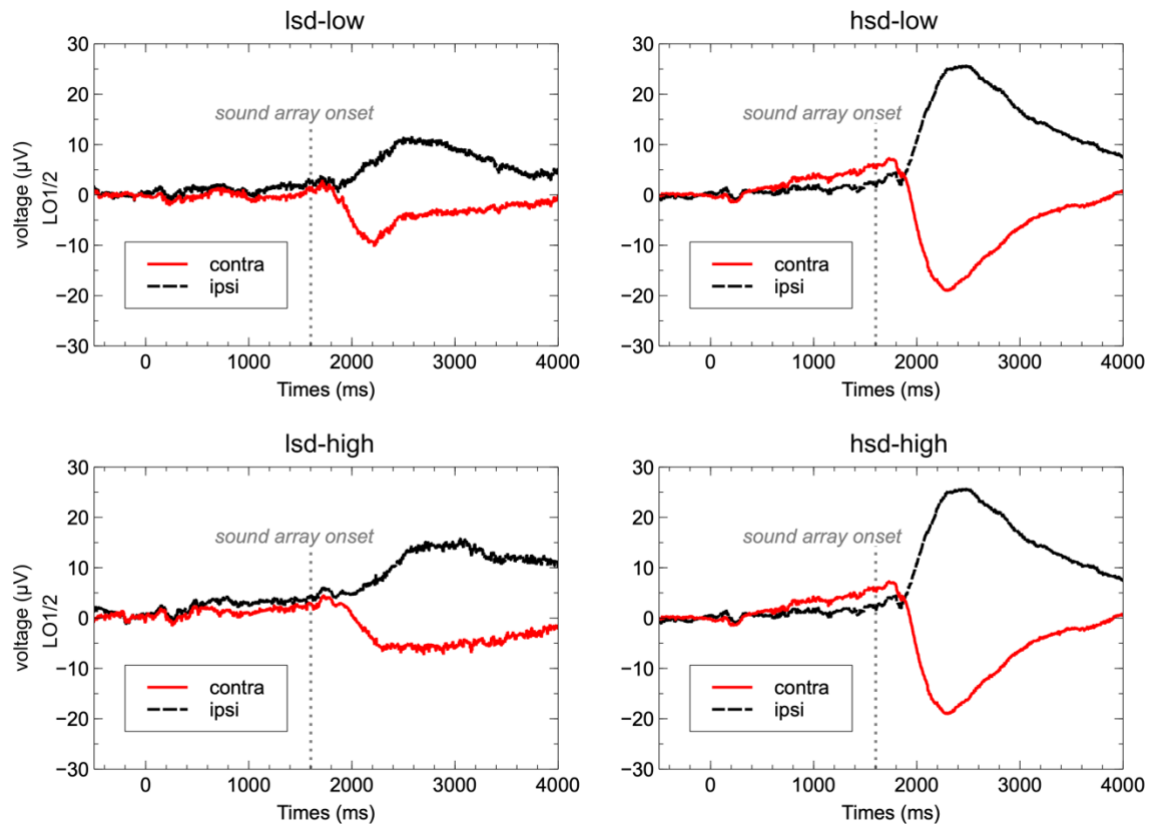

68

69 **Figure 3. Contralateral versus ipsilateral voltages at lateral EOG electrodes LO1 and LO2 relative to the**  
70 **target position for each of the four conditions.**

71

72 To assess the potential impact of horizontal eye movements on alpha lateralization  
73 magnitude, we conducted an analysis of covariance, including spatial demand (high vs. low),  
74 perceptual load (high vs. low), and asymmetry (contra vs. ipsi) as within-subject factors and  
75 the average lateralized hEOG as a covariate. Specifically, to obtain the average lateralized  
76 hEOG voltages, the contralateral minus ipsilateral waveforms for each subject were averaged  
77 across all conditions. In the resulting average waveforms, mean amplitude was measured in-  
78 between 2000 – 3000 ms post cue onset (i.e., 400 – 1600 ms post-sound array). Alpha  
79 lateralization magnitude (using the same time window as reported in the main manuscript)  
80 served as the dependent variable. We found that the covariate (i.e., saccades) was not  
81 significantly related to the magnitude of alpha-band lateralization, as indicated a non-  
82 significant interaction of the factor saccades and asymmetry,  $F(1,15) = 0.67, p = .425$ .  
83 Importantly, the main effect of asymmetry remained significant,  $F(1,15) = 12.39, p = .003$ ,  
84 after controlling for the effect of saccades. This suggests that the overall presence of alpha

85 lateralization is not affected by the occurrence of horizontal eye movements. Further, none of  
86 the interactions, involving the factor saccades turned out to be significant, all  $p > .19$ .

87

88 Further, to assess the potential impact of eye movements on our decoding results, we  
89 performed an exploratory decoding analysis, using the horizontal (LO1/LO2) and vertical  
90 (IO1/IO2) EOG channels as input. The decoding analysis was performed as described in the  
91 main manuscript, with the following exception: Given that all trials (except for individual  
92 premature responses, target-absent trials and incorrectly answered trials) served as input to  
93 the decoding analysis, a five-fold (rather than a three-fold) cross validation was performed.  
94 Supplementary figure 4 illustrates the time-course of decoding accuracy for the low and high  
95 spatial demand condition, respectively. In both conditions, it was possible to decode target  
96 location based on hEOG input (all  $p < .011$ ). However, in contrast to the main decoding  
97 analysis based on the whole-scalp topography of alpha power, we did not find a significant  
98 difference in decoding accuracy between the high vs. low spatial demand condition (cluster-  
99 corrected sign-permutation test,  $p = 1$ ). In addition, overall, decoding accuracy was lower for  
100 hEOG based decoding compared to alpha power decoding, which matches an observation  
101 also made by Popov, Gips, Weisz, & Jensen (2021). Thus, even though it appears that  
102 saccades are more pronounced in the high spatial demand condition, this does not account  
103 for the higher decoding accuracy in the high spatial demand condition that becomes  
104 apparent in the alpha-based decoding.

105

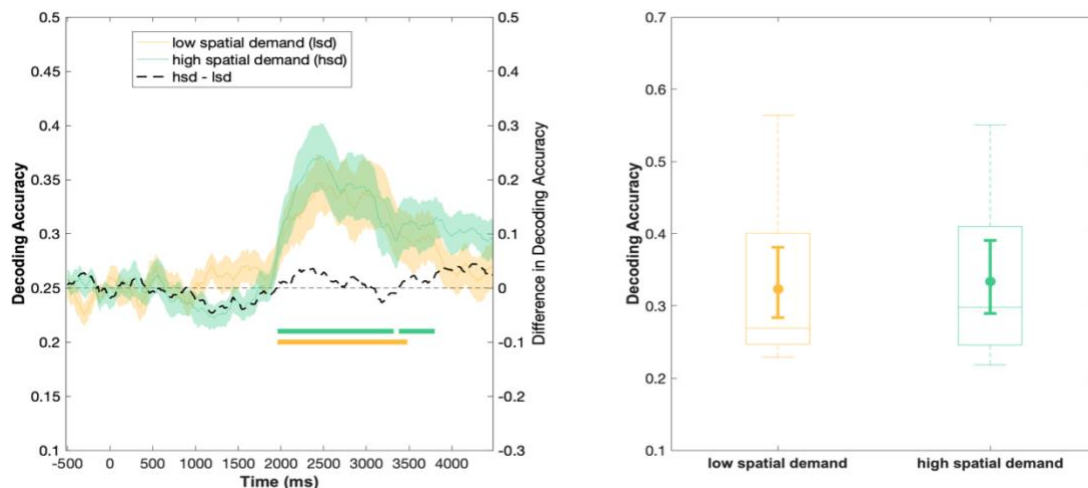

**Figure 4. Location decoding based on the ERP signal at horizontal and vertical EOG electrodes.** (A) Time-course of the average decoding accuracy results in the low (yellow) and high (green) spatial demand condition, respectively. The colored shading indicates  $\pm 1$  SEM. Chance-level performance (i.e., 25%) is indicated by the grey dashed horizontal line. The yellow and green solid bars indicate significant decoding of the target location in the low and high spatial demand condition, respectively. The black solid bar denotes significant differences in decoding ability between the low and the high spatial demand condition. Note that only time-points in-between 1600 – 3800 ms were considered in the statistical analysis. (B) Boxplots refer to the average decoding accuracy in-between 1960 – 3500 ms relative to cue-onset (i.e., 300 – 1900 ms following sound array onset). As per convention, boxplots illustrate the interquartile range and the median. Whiskers extent to the 1.5 times the interquartile range. The superimposed circles show the average decoding accuracy, while the corresponding error bars denote the 95% bootstrap confidence interval of the mean (number of bootstrap samples = 10000).

106

107 Finally, to follow up more closely on whether the apparent differences in hEOG asymmetry  
108 between conditions (and between subjects) systematically covary with the effect of spatial  
109 demand on alpha-based decoding accuracy, we performed a post-hoc ANCOVA: The average  
110 decoding accuracy in-between 1940 – 3340 ms (i.e., approximate time window that resulted  
111 in significant within-condition decoding) served as a dependent variable, spatial demand (low  
112 vs. high) served as a within-subject factor, and the difference in hEOG lateralization (2000 –  
113 3000 ms post cue onset) between the spatial demand conditions (hsd – lsd) was included as a  
114 covariate (referred to as factor 'saccades'). The covariate was not significantly related to  
115 decoding accuracy,  $F(1,15) = 0.52$   $p = .481$ . Critically, the main effect of spatial demand was  
116 still significant after controlling for effect of saccades,  $F(1,15) = 7.14$ ,  $p = .017$ . The interaction  
117 between saccades and spatial demand was not significant,  $F(1,15) = 0.03$ ,  $p = 0.855$ .

118

119 Taken together, the above presented control analyses reassure that the most critical finding –  
120 namely, the greater decoding accuracy for the high spatial demand condition – is not based  
121 on systematic difference in eye movements. Although we cannot be perfectly sure that the

122 within-condition decoding of target location has somewhat picked up on saccade-related  
123 contributions in the signal, we don't think such a contribution should be regarded as merely  
124 artefactual. Rather, it highlights the multimodal functional relevance of auditory alpha  
125 oscillatory activity and the naturally occurring interaction between audition and vision. In line  
126 with that, using a forward encoding procedure, Popov et al., (2021) nicely illustrate that in a  
127 purely auditory task, spatial tuning based on the hEOG signal is positively related to alpha  
128 tuning responses. Specifically, they argue that "auditory attention is linked to the visual  
129 system, at least in part, through pro-active orientation towards the relevant sound origin via  
130 saccades in the direction consistent with the sound origin" (Popov et al 2021, p.18).

### 131 **S5. Decoding analysis based on minimally preprocessed data**

132 Artifact correction has been proposed to be less critical in decoding analysis, given that  
133 classifiers can – in principle – learn to ignore bad channels or suppress noise during training  
134 (Grootswagers, Wardle, & Carlson, 2017). Moreover, minimal preprocessing prevents  
135 unwanted artefacts and spurious decoding due to high-pass (van Driel, Olivers, & Fahrenfort,  
136 2021) or low-pass (Grootswagers et al., 2017) filtering. Hence, the original decoding analysis  
137 was performed using only minimally preprocessed data. Following reviewer concerns, that  
138 artefacts might influence decoding performance, we modified the preprocessing pipeline for  
139 decoding to include artefact correction. The latter is now presented in the main manuscript.  
140 For reasons of transparency, here, we report the decoding results based on minimally  
141 preprocessed data. The latter yielded very comparable results.

142 The continuous data was epoched to create single-trial segments, ranging from -1000  
143 to 4500 ms relative to cue onset, and baseline corrected (i.e., using the 200 ms time-period  
144 prior to cue onset as a baseline). Further, target-absent trials, incorrectly answered trials as  
145 well as trials with a response time < 200 (i.e., premature responses) were excluded. No  
146 filtering, trial rejection or ICA-based artefact correction was applied. The decoding analysis  
147 was performed as described in the main manuscript, except that five rather than three cross-  
148 validations were performed (accounting for the higher number of trials because no further  
149 trial rejection procedure was applied).

150

151

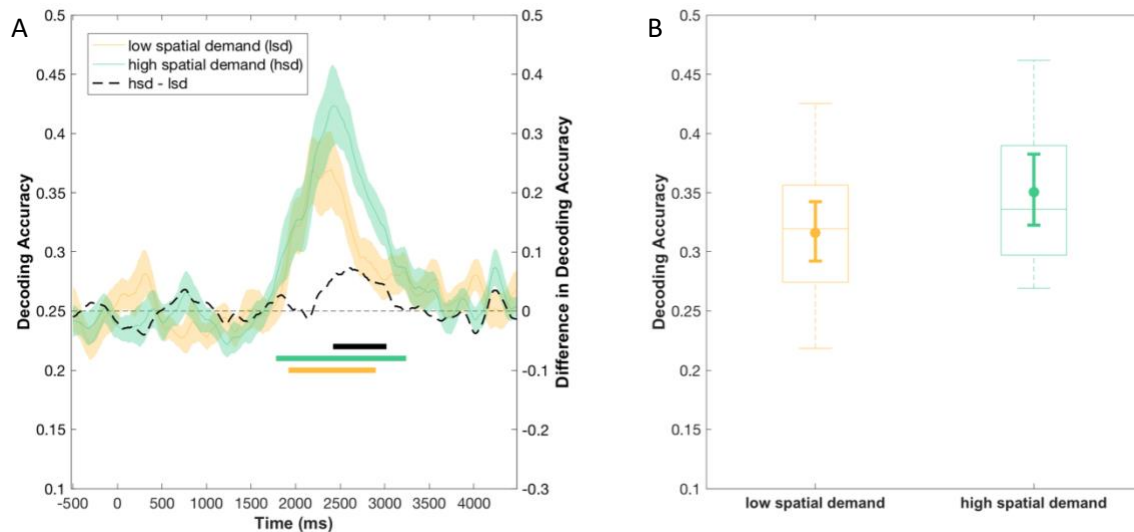

**Figure 5. Location decoding based on the multivariate scalp distribution of alpha power (minimally preprocessed data).** (A) Time-course of the average decoding accuracy results in the low (yellow) and high (green) spatial demand condition, respectively. The colored shading indicates  $\pm 1$  SEM. Chance-level performance (i.e., 25%) is indicated by the grey dashed horizontal line. The yellow and green solid bars indicate significant decoding of the target location in the low and high spatial demand condition, respectively. The black solid bar denotes significant differences in decoding ability between the low and the high spatial demand condition. Note that only time-points in-between 1600 – 3800 ms were considered in the statistical analysis. (B) Boxplots refer to the average decoding accuracy in-between 1800 – 3200 ms relative to cue-onset (i.e., 200 – 1600 ms following sound array onset). As per convention, boxplots illustrate the interquartile range and the median. Whiskers extent to the 1.5 times the interquartile range. The superimposed circles show the average decoding accuracy, while the corresponding error bars denote the 95% bootstrap confidence interval of the mean (number of bootstrap samples = 10000).

152

153 Figure 5A shows the time-course of decoding accuracy for the low vs. high spatial demand  
154 condition, when decoding the exact target sound location based on the topography of alpha-  
155 band activity, as well as the difference in decoding accuracy between conditions. Decoding  
156 accuracy starts to rise above chance level (i.e., 25%) at around 1800 ms (i.e., 200 ms following  
157 sound array onset) and at first, increases continuously in both spatial demand conditions. In  
158 the high spatial demand condition, decoding accuracy reaches a peak at around 2180 ms (i.e.,  
159 580 ms post-sound onset), remains at this level for a couple hundred milliseconds and then  
160 gradually decreases throughout the remainder of the response interval; in the low spatial  
161 demand condition, decoding accuracy continues to rise beyond the peak in the high spatial  
162 demand condition until around ~2440 ms (i.e., 840 ms post-sound onset), and declines quite  
163 immediately thereafter, although it remains on a higher level compared to the low spatial  
164 demand condition. Toward the end of the response interval (i.e., around 3800 ms), decoding  
165 accuracy returns to chance level in both conditions. The cluster mass test revealed that  
166 decoding was significantly greater than chance in both spatial demand conditions. We  
167 identified a significant cluster following sound array onset in each of the two conditions ( $p <$

168  $10^{-4}$ , see Figure 5A, solid green and yellow lines). In the high spatial demand condition, the  
169 cluster extends from around 1800 ms to ~3200 ms; in the low spatial demand condition, the  
170 cluster spans a time period in-between ~1900 ms and 2880 ms relative to sound array onset.  
171 Note, however, that cluster-based permutation test results should not be used to derive  
172 conclusions about the specific onset or offset of a certain effect (Sassenhagen & Draschkow,  
173 2019).

174 The black, dashed line in Figure 5A illustrates the difference in decoding accuracy  
175 between the two spatial demand conditions. A cluster-corrected sign-permutation test  
176 indicated significant differences in decoding ability ( $p < .01$ , one-sided test, cluster extending  
177 from ~2440 – 3000 ms), with higher decoding accuracy in the high spatial demand condition  
178 compared to the low spatial demand condition.

179 Finally, we assessed the overall difference in decoding ability within the post-stimulus  
180 period (specifically, within the approximate time-window that resulted in above-chance  
181 decoding accuracy within both spatial demand conditions). A one-sided permutation test of  
182 the average decoding accuracy between 1800 – 3200 ms consistently revealed a significant  
183 difference in decoding accuracy between the spatial demand conditions ( $p = .001$ ).

## S6. References

- 184 Deng, Y., Choi, I., & Shinn-Cunningham, B. G. (2020). Topographic specificity of alpha power  
185 during auditory spatial attention. *NeuroImage*, 207, 116360.  
186 <https://doi.org/10.1016/j.neuroimage.2019.116360>
- 187 Grootswagers, T., Wardle, S. G., & Carlson, T. A. (2017). Decoding dynamic brain patterns from  
188 evoked responses: A tutorial on multivariate pattern analysis applied to time series  
189 neuroimaging data. *Journal of Cognitive Neuroscience*, 29(4), 677–697.  
190 [https://doi.org/10.1162/jocn\\_a\\_01068](https://doi.org/10.1162/jocn_a_01068)
- 191 Popov, T., Gips, B., Weisz, N., & Jensen, O. (2021). Brain areas associated with visual spatial  
192 attention display topographic organization during auditory spatial attention. *BioRxiv*.  
193 <https://doi.org/https://doi.org/10.1101/2021.03.15.435371>
- 194 Sassenhagen, J., & Draschkow, D. (2019). Cluster-based permutation tests of MEG/EEG data  
195 do not establish significance of effect latency or location. *Psychophysiology*, 56(6),  
196 e13335. <https://doi.org/10.1111/psyp.13335>



- 197 van Driel, J., Olivers, C. N. ., & Fahrenfort, J. J. (2021). High-pass filtering artifacts in  
198 multivariate classification of neural time series data. *Journal of Neuroscience Methods*,  
199 352, 109080. <https://doi.org/10.1101/530220>
- 200 van Moorselaar, D., Foster, J. J., Sutterer, D. W., Theeuwes, J., Olivers, C. N. L., & Awh, E. (2018).  
201 Spatially Selective Alpha Oscillations Reveal Moment-by-Moment Trade-offs between  
202 Working Memory and Attention. *Journal of Cognitive Neuroscience*, 30(2), 256–266.  
203 [https://doi.org/10.1162/jocn\\_a\\_01198](https://doi.org/10.1162/jocn_a_01198)  
204
